# Supplementary material for: Validation and clinical application of a targeted next-generation sequencing gene panel for solid and hematologic malignancies
Source: PeerJ. 2020 Oct 6;8:e10069. doi: 10.7717/peerj.10069 (PMC7546223; doi:10.7717/peerj.10069)
Supplement: Supplemental Information 6 [file peerj-08-10069-s006.xlsx]

## Sheet: Table S1
Table S1. Gene description of the TsT26 targeted panel and related genetic alterations identified in various tumor types.
Gene symbol	Gene name	Genome location	Chromosome band	Category	Genetic aberration types	Tumor types (somatic)
AKT1	v-akt murine thymoma viral oncogene homolog 1	14:104770341-104792643	14q32.32	oncogene	Mis	breast; colorectal; ovarian; NSCLC
ALK	anaplastic lymphoma kinase	2:29193224-29920659	2p23	oncogene	T; Mis; A	ALCL; NSCLC; neuroblastoma; inflammatory myofibroblastic tumour; Spitzoid tumour
APC	adenomatous polyposis of the colon gene	5:112754891-112844126	5q21	TSG	D; Mis; N; F; S	colorectal; pancreatic; desmoid; hepatoblastoma; glioma; other CNS
BRAF	v-raf murine sarcoma viral oncogene homolog B1	7:140734597-140924703	7q34	oncogene	Mis; T; O	melanoma; colorectal; papillary thyroid; borderline ovarian; NSCLC; cholangiocarcinoma; pilocytic astrocytoma; Spitzoid tumour; pancreas acinar carcinoma; melanocytic nevus; prostate; gastric
CDH1	cadherin type 1; E-cadherin	16:68737416-68833499	16q22.1	TSG	Mis; N; F; S	lobular breast; gastric
CTNNB1	catenin (cadherin-associated protein); beta 1	3:41224069-41239342	3p22-p21.3	oncogene	Mis; O; T	colorectal; ovarian; hepatoblastoma; pleomorphic salivary gland adenoma; other tumour types
EGFR	epidermal growth factor receptor	7:55019278-55205617	7p12.3-p12.1	oncogene	A; O; Mis	glioma; NSCLC
ERBB2	v-erb-b2 erythroblastic leukemia viral oncogene homolog 2	17:39700239-39728044	17q21.1	oncogene	A; Mis; O	breast; ovarian; other tumour types; NSCLC; gastric
FBXW7	F-box and WD-40 domain protein 7	4:152322881-152411803	4q31.3	TSG	Mis; N; D; F	colorectal; endometrial; T-ALL
FGFR2	fibroblast growth factor receptor 2	10:121479857-121593817	10q26	oncogene	Mis	gastric; NSCLC; endometrial
FOXL2	forkhead box L2	3:138945592-138946722	3q23	oncogene	Mis	granulosa-cell tumour of the ovary
GNAQ	guanine nucleotide binding protein q polypeptide	9:77721323-78031235	9q21	oncogene	Mis	uveal melanoma; primary central nervous system melanocytic neoplasms
GNAS	guanine nucleotide binding protein alpha stimulating activity polypeptide 1	20:58891727-58910829	20q13.2	oncogene	Mis	pituitary adenoma; pancreatic intraductal papillary mucinous neoplasm; fibrous dysplasia
KIT	v-kit Hardy-Zuckerman 4 feline sarcoma viral oncogene homolog	4:54658015-54738557	4q12	oncogene	Mis; O	GIST; AML; TGCT; mastocytosis; mucosal melanoma
KRAS	v-Ki-ras2 Kirsten rat sarcoma 2 viral oncogene homolog	12:25209795-25245384	12p12.1	oncogene	Mis	pancreatic; colorectal; lung; thyroid; AML; other tumour types
MAP2K1	mitogen-activated protein kinase kinase 1	15:66387348-66490615	15q22.1-q22.33	oncogene	Mis	NSCLC; melanoma; colorectal
MET	met proto-oncogene (hepatocyte growth factor receptor)	7:116699085-116796124	7q31	oncogene	Mis	papillary renal; head-neck squamous cell
MSH6	mutS homolog 6	2:47783234-47806860	2p16	TSG	Mis; N; F; S	colorectal
NRAS	neuroblastoma RAS viral (v-ras) oncogene homolog	1:114708535-114716160	1p13.2	oncogene	Mis	melanoma; MM; AML; thyroid
PDGFRA	platelet-derived growth factor alpha-receptor	4:54258769-54295272	4q11-q13	oncogene	Mis; O; T	GIST; idiopathic hypereosinophilic syndrome; paediatric glioblastoma
PIK3CA	phosphoinositide-3-kinase catalytic alpha polypeptide	3:179198826-179234364	3q26.3	oncogene	Mis	colorectal; gastric; glioblastoma; breast
PTEN	phosphatase and tensin homolog gene	10:87864470-87965472	10q23.3	TSG	D; Mis; N; F; S	glioma; prostate; endometrial
SMAD4	SMAD family member 4	18:51047047-51078467	18q21.1	TSG	D; Mis; N; F	colorectal; pancreatic; small intestine
SRC	SRC proto-oncogene; non-receptor tyrosine kinase	20:37384154-37403379	20q11.23	oncogene	Mis; N	colorectal cancer; endometrial carcinoma
STK11	serine/threonine kinase 11 gene	19:1206914-1226647	19p13.3	TSG	D; Mis; N; F; S	NSCLC; pancreatic
TP53	tumor protein p53	17:7669609-7676594	17p13	TSG	Mis; N; F; T	breast; colorectal; lung; sarcoma; adrenocortical; glioma; Spitzoid tumour; multiple other tumour types
A=amplification, ALCL=anaplastic large-cell lymphoma, AML=acute myeloid leukaemia, CNS=central nervous system, D=large deletion, F=frameshift, GIST=gastrointestinal stromal tumor, MIS=missense, MM=multiple myeloma,
N=nonsense, NSCLC=non small cell lung carcinoma, O=other, S=splice site, T=translocation, T-ALL=T-cell acute lymphoblastic leukaemia, TGCT=testicular germ cell tumour, TSG=tumor suppressor gene,
