# Supplementary material for: Validation and clinical application of a targeted next-generation sequencing gene panel for solid and hematologic malignancies
Source: PeerJ. 2020 Oct 6;8:e10069. doi: 10.7717/peerj.10069 (PMC7546223; doi:10.7717/peerj.10069)
Supplement: Supplemental Information 8 [file peerj-08-10069-s008.xlsx]

## Sheet: Table S3
Table S3. Tumor types dissected by histological types included in the set of 399 patients
Tumor type	Histological type	Number of patients, no. (%)	NGS fail	NGS not detected variant	NGS detected variant	TsT26 # cases tested for ssm	TCGA # cases tested for ssm	TCGA Study Name	TCGA Study Abbreviation
Gastrointestinal		115(29)	29	7	79	86	1737		COAD+READ+STCA+ESCA+PAAD+CHOL+LIHC
	Colorectal adenocarcinoma	55(49)	10	0	45	45	534	Colon + Rectum adenocarcinoma	COAD+READ
	Gastroesophagic carcinoma	24(21)	5	2	17	19	619	Stomach adenocarcinoma + Esophageal carcinoma	STCA+ESCA
	Pancreatic carcinoma	19(17)	6	2	11	13	171	Pancreatic adenocarcinoma	PAAD
	Billiary duct carcinoma	11(9)	4	2	5	7	50	Cholangiocarcinoma	CHOL
	CUP	3(3)	3	0	0	0
	Hepatocarcinoma	2(2)	0	1	1	2	363	Liver hepatocellular carcinoma	LIHC
	Normal liver	1(1)	1	0	0	0
Hematologic		73(18)	24	21	28	49	173		DLBC+LAML
	Lymphoma	38(52)	13	9	16	25	37	Lymphoid Neoplasm Diffuse Large B-cell Lymphoma	DLBC
	Leukemia	12(16)	2	5	5	10	136	Acute Myeloid Leukemia	LAML
	Myeloma	5(7)
	Histiocytosis	5(7)
	Plasmocytoma	4(5)
	Histiocytic sarcoma	3(4)
	Dendritic cell tumor	2(3)
	Thymic carcinoma	1(1)
	Hemangiopericitome	1(1)
	Xanthogranuloma	1(1)
	Lymphoid hiperplasia	1(1)
Lung		51(13)	20	5	26	31	1049	Lung adenocarcinoma + Lung squamous cell carcinoma	LUAD+LUSC
	NSCLC	44(86)
	SCLC	5(10)
	Neuroendocrine carcinoma	1(2)
	Normal pleura	1(2)
Gynecologic		38(8)	15	5	18	23	1311		OV+CESC+UCEC+UCS
	Ovarian serous adenocarcinoma	17(45)	4	2	11	13	436	Ovarian serous cystadenocarcinoma	OV
	Cervical carcinoma	10(26)	7	1	2	3	289	Cervical squamous cell carcinoma and endocervical adenocarcinoma	CESC
	Endometrial carcinoma	7(18)	2	1	4	5	529	Uterine Corpus Endometrial Carcinoma	UCEC
	Vulvar carcinoma	2(5)	1	0	1	1
	Soft tissue sarcoma	2(5)	1	1	0	1	57	Uterine Carcinosarcoma	UCS
Breast	Breast carcinoma	33(8)	11	8	14	22	981	Breast invasive carcinoma	BRCA
Genitourinary		20(5)	6	7	7	14	1567		BLCA+KIRC+KIRP+ACC+PRAD
	Urothelial carcinoma	7(35)	2	0	5	5	410	Bladder Urothelial Carcinoma	BLCA
	Renal carcinoma	7(35)	3	4	0	4	604	Kidney renal clear and papillary cell carcinoma	KIRC+KIRP
	Adrenal carcinoma	4(20)	0	2	2	4	88	Adrenocortical carcinoma	ACC
	Prostate carcinoma	2(10)	1	1	0	1	465	Prostate adenocarcinoma	PRAD
Head and Neck	Head and Neck carcinoma	19(5)	6	5	8	19	951	Head and Neck squamous cell and thyroid carcinoma	HNSC+THCA
Melanoma	Skin melanoma	15(4)	7	2	6	8	546	Skin Cutaneous + Uveal Melanoma	SKCM+UVM
Central Nervous System	Glial tumor	10(3)	5	2	3	5	896	Glioblastoma multiforme + brain lower grade glioma	GBM+LGG
Other solid tumor		25(6)
	Soft tissue sarcoma	13(52)	6	4	3	7	237	Sarcoma	SARC
	Mesothelioma	7(28)	4	2	1	3	78	Mesothelioma	MESO
	Unknown	3(12)			1
	Neuroendocrine carcinoma	2(8)
*mutation frequency was analysed for both ovarian serous and ovarian carcinoma. CUP: carcinoma of unknown primary origin, GIST: gastrointestinal stromal tumor, NSCLC: non small cell lung carcinoma, SCLC: small cell lung carcinoma, ssm: single somatic muation, TCGA: The cancer genome atlas,
