# Supplementary material for: Validation and clinical application of a targeted next-generation sequencing gene panel for solid and hematologic malignancies
Source: PeerJ. 2020 Oct 6;8:e10069. doi: 10.7717/peerj.10069 (PMC7546223; doi:10.7717/peerj.10069)
Supplement: Supplemental Information 10 [file peerj-08-10069-s010.xlsx]

## Sheet: Table S5
Table S5. Clinical classification of detected variants
Tumor type	Gene symbol	Number of detected variants	Consequence	Reported variant, DNA level HGVSc	Reported variant, protein level HGVSp	Variant classification
GI	KRAS	16	missense_variant	NM_033360.2:c.35G>A	NP_203524.1:p.Gly12Asp	Pathogenic
	KRAS	9	missense_variant	NM_033360.2:c.35G>T	NP_203524.1:p.Gly12Val	Pathogenic
	MET	5	missense_variant	NM_001127500.1:c.504G>T	NP_001120972.1:p.Glu168Asp	benign/likely benign
	KRAS	4	missense_variant	NM_033360.2:c.38G>A	NP_203524.1:p.Gly13Asp	Pathogenic
	TP53	4	missense_variant	NM_000546.5:c.733G>A	NP_000537.3:p.Gly245Ser	Pathogenic
	TP53	4	missense_variant	NM_000546.5:c.524G>A	NP_000537.3:p.Arg175His	Pathogenic
	APC	3	frameshift_variant, feature_truncation	NM_000038.5:c.3921_3925delAAAAG	NP_000029.2:p.Glu1309AspfsTer4	Pathogenic
	APC	3	stop_gained	NM_000038.5:c.2626C>T	NP_000029.2:p.Arg876Ter	Pathogenic
	KRAS	3	missense_variant	NM_033360.2:c.436G>A	NP_203524.1:p.Ala146Thr	Pathogenic
	PIK3CA	3	missense_variant	NM_006218.2:c.1633G>A	NP_006209.2:p.Glu545Lys	Pathogenic
	TP53	3	missense_variant	NM_033632.3:c.1501G>A	NP_361014.1:p.Val501Ile	Pathogenic
	APC	2	stop_gained	NM_000038.5:c.4348C>T	NP_000029.2:p.Arg1450Ter	Pathogenic
	APC	2	missense_variant	NM_000038.5:c.2561G>A	NP_000029.2:p.Arg854Lys	VUS
	KRAS	2	missense_variant	NM_033360.2:c.34G>A	NP_203524.1:p.Gly12Ser	Pathogenic
	KRAS	2	missense_variant	NM_033360.2:c.182_183invAA	NP_203524.1:p.Gln61Leu	Pathogenic
	SMAD4	2	missense_variant	NM_005359.5:c.1082G>A	NP_005350.1:p.Arg361His	Pathogenic
	TP53	2	missense_variant	NM_000546.5:c.742C>T	NP_000537.3:p.Arg248Trp	Pathogenic
	TP53	2	missense_variant	NM_000546.5:c.818G>A	NP_000537.3:p.Arg273His	Pathogenic
	TP53	2	stop_gained	NM_000546.5:c.916C>T	NP_000537.3:p.Arg306Ter	Pathogenic
	APC	1	missense_variant	NM_000038.5:c.2653G>A	NP_000029.2:p.Ala885Thr	VUS
	APC	1	missense_variant	NM_000038.5:c.3949G>C	NP_000029.2:p.Glu1317Gln	VUS
	APC	1	stop_gained	NM_000038.5:c.4222G>T	NP_000029.2:p.Glu1408Ter	Pathogenic
	APC	1	frameshift_variant, feature_truncation	NM_000038.5:c.3921_3925delAAAAG	NP_000029.2:p.Glu1309AspfsTer4	Pathogenic
	APC	1	missense_variant	NM_000038.5:c.3386T>C	NP_000029.2:p.Leu1129Ser	Pathogenic
	APC	1	missense_variant	NM_000038.5:c.2673G>A	NP_000029.2:p.Met891Ile	VUS
	APC	1	frameshift_variant	NM_000038.5:c.3927_3931delAAAGA	NP_000029.2:p.Glu1309AspfsTer4	VUS
	APC	1	stop_gained	NM_000038.5:c.3880C>T	NP_000029.2:p.Gln1294Ter	Pathogenic
	APC	1	stop_gained	NM_000038.5:c.4216C>T	NP_000029.2:p.Gln1406Ter	Pathogenic
	APC	1	stop_gained	NM_000038.5:c.4285C>T	NP_000029.2:p.Gln1429Ter	Pathogenic
	APC	1	stop_gained	NM_000038.5:c.3340C>T	NP_000029.2:p.Arg1114Ter	Pathogenic
	APC	1	frameshift_variant, feature_truncation	NM_000038.5:c.3238_3239delGA	NP_000029.2:p.Ser1081HisfsTer2	Pathogenic
	APC	1	stop_gained	NM_000038.5:c.3845C>A	NP_000029.2:p.Ser1282Ter	Pathogenic
	APC	1	stop_gained	NM_000038.5:c.4031C>G	NP_000029.2:p.Ser1344Ter	Pathogenic
	APC	1	frameshift_variant, feature_truncation	NM_000038.5:c.4245delT	NP_000029.2:p.Ser1415ArgfsTer4	Pathogenic
	APC	1	stop_gained	NM_000038.5:c.4067C>G	NP_000029.2:p.Ser1356Ter	Pathogenic
	APC	1	stop_gained	NM_000038.5:c.2684C>G	NP_000029.2:p.Ser895Ter	Pathogenic
	APC	1	frameshift_variant, feature_elongation	NM_000038.5:c.4660_4661insA	NP_000029.2:p.Thr1556AsnfsTer3	Pathogenic
	APC	1	frameshift_variant, feature_truncation	NM_000038.5:c.4241delT	NP_000029.2:p.Val1414GlufsTer5	Pathogenic
	BRAF	1	missense_variant	NM_004333.4:c.1406G>C	NP_004324.2:p.Gly469Ala	Pathogenic
	BRAF	1	missense_variant	NM_004333.4:c.1801A>G	NP_004324.2:p.Lys601Glu	Pathogenic
	BRAF	1	missense_variant	NM_004333.4:c.1790T>G	NP_004324.2:p.Leu597Arg	Likely Pathogenic
	BRAF	1	missense_variant	NM_004333.4:c.1411G>A	NP_004324.2:p.Val471Ile	Pathogenic
	BRAF	1	missense_variant	NM_004333.4:c.1799T>A	NP_004324.2:p.Val600Glu	Pathogenic
	CDH1	1	missense_variant	NM_004360.3:c.1774G>A	NP_004351.1:p.Ala592Thr	VUS
	CTNNB1	1	missense_variant	NM_001904.3:c.107A>C	NP_001895.1:p.His36Pro	Pathogenic
	CTNNB1	1	missense_variant	NM_001098210.1:c.47C>T	NP_001091680.1:p.Pro16Leu	VUS
	CTNNB1	1	missense_variant	NM_001904.3:c.98C>G	NP_001895.1:p.Ser33Cys	Pathogenic
	CTNNB1	1	missense_variant	NM_001098210.1:c.121A>G	NP_001091680.1:p.Thr41Ala	Pathogenic
	EGFR	1	missense_variant	NM_005228.3:c.2081C>T	NP_005219.2:p.Pro694Leu	VUS
	FBXW7	1	missense_variant	NM_033632.3:c.1780C>T	NP_361014.1:p.Leu594Phe	Pathogenic
	FBXW7	1	missense_variant	NM_033632.3:c.1792A>T	NP_361014.1:p.Asn598Tyr	VUS
	FBXW7	1	stop_gained	NM_033632.3:c.1177C>T	NP_361014.1:p.Arg393Ter	Pathogenic
	FBXW7	1	missense_variant	NM_033632.3:c.1393C>T	NP_361014.1:p.Arg465Cys	Pathogenic
	FBXW7	1	missense_variant	NM_033632.3:c.1501G>A	NP_361014.1:p.Val501Ile	VUS
	FGFR2	1	missense_variant	NM_022970.3:c.757C>T	NP_075259.4:p.Pro253Ser	VUS
	GNAQ	1	stop_gained	NM_002072.3:c.589C>T	NP_002063.2:p.Gln197Ter	Pathogenic
	GNAS	1	missense_variant	NM_080425.2:c.2524C>T	NP_536350.2:p.Arg842Cys	VUS
	GNAS	1	missense_variant	NM_080425.2:c.2530C>T	NP_536350.2:p.Arg844Cys	VUS
	GNAS	1	missense_variant	NM_080425.2:c.2531G>A	NP_536350.2:p.Arg844His	Pathogenic
	ERBB2	1	missense_variant	NM_004448.2:c.2447G>A	NP_004439.2:p.Arg816His	VUS
	ERBB2	1	missense_variant	NM_004448.2:c.2342A>G	NP_004439.2:p.Tyr781Cys	Pathogenic
	KIT	1	missense_variant	NM_000222.2:c.1478C>A	NP_000213.1:p.Ala493Asp	Pathogenic
	KIT	1	missense_variant,splice_region_variant	NM_000222.2:c.2485G>C	NP_000213.1:p.Ala829Pro	Pathogenic
	KIT	1	splice_region_variant,synonymous_variant	NM_000222.2:c.2484C>T	NP_000213.1:p.Asn828=	VUS
	KIT	1	missense_variant	NM_000222.2:c.1689_1692delAAAT	NP_000213.1:p.Ile563MetfsTer8	Pathogenic
	KIT	1	inframe_insertion	NM_000222.2:c.[1669_1670insGGCAGGTTGA;1672_1673insGG]	NP_000213.1:p.Lys558_Val559ins5	Pathogenic
	KIT	1	missense_variant	NM_000222.2:c.2494C>T	NP_000213.1:p.Pro832Ser	VUS
	KIT	1	splice_donor_variant	NM_000222.2:c.2596+1G>A	splicing	VUS
	KIT	1	missense_variant	NM_000222.2:c.1961T>C	NP_000213.1:p.Val654Ala	Pathogenic
	KIT	1	inframe_deletion	NM_000222.2:c.1670_1678delGGAAGGTTG	NP_000213.1:p.Trp557_Val560delinsPhe	Pathogenic
	KRAS	1	inframe_insertion	NM_033360.2:c.36_38dupTGG	NP_203524.1:p.Gly12dup	Pathogenic
	KRAS	1	missense_variant	NM_033360.2:c.34G>C	NP_203524.1:p.Gly12Arg	Pathogenic
	KRAS	1	missense_variant	NM_033360.2:c.34_36delGGTinsTGG	NP_203524.1:p.Gly12Trp	Pathogenic
	KRAS	1	missense_variant	NM_033360.2:c.181_183delCAAinsGAT	NP_203524.1:p.Gln61Asp	Pathogenic
	KRAS	1	missense_variant	NM_033360.2:c.183A>C	NP_203524.1:p.Gln61His	Pathogenic
	KRAS	1	missense_variant	NM_033360.2:c.180_182delTCAinsAAG	NP_203524.1:p.Gln61Arg	Pathogenic
	KRAS	1	missense_variant	NM_033360.2:c.40G>A	NP_203524.1:p.Val14Ile	Pathogenic
	MET	1	missense_variant	NM_001127500.1:c.3334C>T	NP_001120972.1:p.His1112Tyr	Likely Pathogenic
	MET	1	missense_variant	NM_001127500.1:c.1058C>T	NP_001120972.1:p.Ser353Phe	Pathogenic
	MET	1	missense_variant	NM_001127500.1:c.3029C>T	NP_001120972.1:p.Thr1010Ile	VUS
	NRAS	1	missense_variant	NM_002524.4:c.173C>T	NP_002515.1:p.Thr58Ile	Pathogenic
	NRAS	1	missense_variant	NM_002524.4:c.203G>A	NP_002515.1:p.Arg68Lys	VUS
	PIK3CA	1	missense_variant	NM_006218.2:c.248T>G	NP_006209.2:p.Phe83Cys	VUS
	PIK3CA	1	missense_variant	NM_006218.2:c.1313C>T	NP_006209.2:p.Ser438Phe	VUS
	PIK3CA	1	missense_variant	NM_006218.2:c.1624G>A	NP_006209.2:p.Glu542Lys	Pathogenic
	PIK3CA	1	missense_variant	NM_006218.2:c.1634A>C	NP_006209.2:p.Glu545Ala	Pathogenic
	PIK3CA	1	missense_variant, splice_region_variant	NM_006218.2:c.353G>A	NP_006209.2:p.Gly118Asp	Pathogenic
	PIK3CA	1	missense_variant	NM_006218.2:c.3140A>T	NP_006209.2:p.His1047Leu	Pathogenic
	PIK3CA	1	missense_variant	NM_006218.2:c.3140A>G	NP_006209.2:p.His1047Arg	Pathogenic
	PIK3CA	1	missense_variant	NM_006218.2:c.3139C>T	NP_006209.2:p.His1047Tyr	Pathogenic
	PIK3CA	1	inframe_deletion	NM_006218.2:c.300_311delAGTAATTGAACC	NP_006209.2:p.Val101_Pro104del	Pathogenic
	PIK3CA	1	missense_variant	NM_006218.2:c.1636C>A	NP_006209.2:p.Gln546Lys	Pathogenic
	PIK3CA	1	missense_variant	NM_006218.2:c.436G>A	NP_006209.2:p.Val146Ile	VUS
	PTEN	1	missense_variant	NM_000314.4:c.8C>T	NP_000305.3:p.Ala3Val	VUS
	PTEN	1	missense_variant	NM_000314.4:c.370T>G	NP_000305.3:p.Cys124Gly	Pathogenic
	PTEN	1	missense_variant,splice_region_variant	NM_000314.4:c.632G>A	NP_000305.3:p.Cys211Tyr	VUS
	SMAD4	1	missense_variant	NM_005359.5:c.1611C>A	NP_005350.1:p.Asp537Glu	Pathogenic
	SMAD4	1	stop_gained	NM_005359.5:c.1558G>T	NP_005350.1:p.Glu520Ter	Pathogenic
	SMAD4	1	missense_variant	NM_005359.5:c.1519A>G	NP_005350.1:p.Lys507Glu	VUS
	SMAD4	1	missense_variant	NM_005359.5:c.1619T>C	NP_005350.1:p.Leu540Pro	Pathogenic
	SMAD4	1	inframe_insertion	NM_005359.5:c.1070_1087dupCTGGAGGAGATCGCTTTT	NP_005350.1:p.Ser357_Phe362dup	VUS
	SMAD4	1	stop_gained	NM_005359.5:c.1546C>T	NP_005350.1:p.Gln516Ter	Pathogenic
	SMAD4	1	missense_variant	NM_005359.5:c.1487G>A	NP_005350.1:p.Arg496His	Pathogenic
	SRC	1	missense_variant	NM_005417.3:c.1574C>T	NP_005408.1:p.Ser525Phe	VUS
	TP53	1	frameshift_variant, feature_truncation	NM_000546.5:c.723delC	NP_000537.3:p.Cys242AlafsTer5	Pathogenic
	TP53	1	missense_variant	NM_000546.5:c.596G>T	NP_000537.3:p.Gly199Val	Pathogenic
	TP53	1	missense_variant	NM_000546.5:c.734G>A	NP_000537.3:p.Gly245Asp	Pathogenic
	TP53	1	stop_gained	NM_000546.5:c.796G>T	NP_000537.3:p.Gly266Ter	Pathogenic
	TP53	1	missense_variant	NM_000546.5:c.532C>G	NP_000537.3:p.His178Asp	Pathogenic
	TP53	1	missense_variant	NM_000546.5:c.536A>G	NP_000537.3:p.His179Arg	Pathogenic
	TP53	1	frameshift_variant	NM_000546.5:c.584delT	NP_000537.3:p.Ile195ThrfsTer52	Pathogenic
	TP53	1	missense_variant	NM_000546.5:c.490A>G	NP_000537.3:p.Lys164Glu	Pathogenic
	TP53	1	missense_variant	NM_000546.5:c.434T>A	NP_000537.3:p.Leu145Gln	Pathogenic
	TP53	1	missense_variant	NM_000546.5:c.736A>T	NP_000537.3:p.Met246Leu	Pathogenic
	TP53	1	missense_variant	NM_000546.5:c.215C>G	NP_000537.3:p.Pro72Arg	VUS
	TP53	1	stop_gained	NM_000546.5:c.499C>T	NP_000537.3:p.Gln167Ter	Pathogenic
	TP53	1	stop_gained	NM_000546.5:c.574C>T	NP_000537.3:p.Gln192Ter	Pathogenic
	TP53	1	missense_variant	NM_000546.5:c.523C>G	NP_000537.3:p.Arg175Gly	Pathogenic
	TP53	1	stop_gained	NM_000546.5:c.637C>T	NP_000537.3:p.Arg213Ter	Pathogenic
	TP53	1	missense_variant	NM_000546.5:c.817C>T	NP_000537.3:p.Arg273Cys	Pathogenic
	TP53	1	missense_variant	NM_000546.5:c.839G>A	NP_000537.3:p.Arg280Lys	Pathogenic
	TP53	1	missense_variant	NM_000546.5:c.844C>T	NP_000537.3:p.Arg282Trp	Likely Pathogenic
	TP53	1	missense_variant	NM_000546.5:c.1009C>T	NP_000537.3:p.Arg337Cys	Pathogenic
	TP53	1	frameshift_variant, feature_truncation	NM_000546.5:c.347delC	NP_000537.3:p.Ser116LeufsTer7	Pathogenic
	TP53	1	missense_variant, splice_region_variant	NM_000546.5:c.374C>T	NP_000537.3:p.Thr125Met	Pathogenic
	TP53	1	missense_variant	NM_000546.5:c.514G>T	NP_000537.3:p.Val172Phe	Pathogenic
	TP53	1	missense_variant	NM_000546.5:c.517G>A	NP_000537.3:p.Val173Met	Pathogenic
	TP53	1	missense_variant	NM_000546.5:c.488A>G	NP_000537.3:p.Tyr163Cys	Pathogenic
	TP53	1	missense_variant	NM_000546.5:c.659A>G	NP_000537.3:p.Tyr220Cys	Pathogenic
	TP53	1	missense_variant	NM_000546.5:c.700T>A	NP_000537.3:p.Tyr234Asn	Pathogenic
Hematologic	TP53	3	missense_variant	NM_000546.5:c.1096T>G	NP_000537.3:p.Ser366Ala	VUS
	KRAS	2	missense_variant	NM_033360.2:c.182A>G	NP_203524.1:p.Gln61Arg	Pathogenic
	APC	1	missense_variant	NM_000038.5:c.3949G>C	NP_000029.2:p.Glu1317Gln	Pathogenic
	APC	1	missense_variant	NM_000038.5:c.3920T>A	NP_000029.2:p.Ile1307Lys	Pathogenic
	APC	1	missense_variant	NM_000038.5:c.3386T>C	NP_000029.2:p.Leu1129Ser	VUS
	BRAF	1	missense_variant	NM_004333.4:c.1405G>A	NP_004324.2:p.Gly469Arg	Pathogenic
	BRAF	1	missense_variant	NM_004333.4:c.1397G>A	NP_004324.2:p.Gly466Glu	Pathogenic
	BRAF	1	missense_variant	NM_004333.4:c.1799T>A	NP_004324.2:p.Val600Glu	Pathogenic
	ERBB2	1	missense_variant	NM_004448.2:c.1960A>G	NP_004439.2:p.Ile654Val	VUS
	ERBB2	1	missense_variant	NM_004448.2:c.2348C>T	NP_004439.2:p.Ser783Phe	VUS
	FBXW7	1	missense_variant	NM_033632.3:c.1939A>C	NP_361014.1:p.Lys647Gln	Pathogenic
	KRAS	1	missense_variant	NM_033360.2:c.37G>T	NP_203524.1:p.Gly13Cys	Pathogenic
	MET	1	missense_variant	NM_001127500.1:c.1085T>C	NP_001120972.1:p.Met362Thr	VUS
	MET	1	missense_variant	NM_001127500.1:c.504G>T	NP_001120972.1:p.Glu168Asp	benign/likely benign
	MET	1	missense_variant	NM_001127500.1:c.1085T>C	NP_001120972.1:p.Met362Thr	VUS
	MET	1	missense_variant	NM_001127500.1:c.1640G>A	NP_001120972.1:p.Arg547Gln	VUS
	MSH6	1	missense_variant	NM_000179.2:c.3267A>T	NP_000170.1:p.Leu1089Phe	VUS
	NRAS	1	missense_variant	NM_002524.4:c.504G>A	NP_002515.1:p.Met168Ile	VUS
	NRAS	1	missense_variant	NM_002524.4:c.181C>A	NP_002515.1:p.Gln61Lys	Pathogenic
	PIK3CA	1	missense_variant	NM_006218.2:c.1348C>T	NP_006209.2:p.His450Tyr	VUS
	PTEN	1	missense_variant	NM_000314.4:c.107G>A	NP_000305.3:p.Gly36Glu	Pathogenic
	PTEN	1	stop_gained,splice_region_variant	NM_000314.4:c.81T>G	NP_000305.3:p.Tyr27Ter	Pathogenic
	STK11	1	missense_variant	NM_000455.4:c.992G>A	NP_000446.1:p.Arg331Gln	VUS
	TP53	1	missense_variant	NM_000546.5:c.482C>A	NP_000537.3:p.Ala161Asp	Pathogenic
	TP53	1	missense_variant	NM_000546.5:c.856G>A	NP_000537.3:p.Glu286Lys	Pathogenic
	TP53	1	missense_variant	NM_000546.5:c.536A>G	NP_000537.3:p.His179Arg	Pathogenic
	TP53	1	missense_variant	NM_000546.5:c.578A>T	NP_000537.3:p.His193Leu	Pathogenic
	TP53	1	missense_variant	NM_000546.5:c.716A>G	NP_000537.3:p.Asn239Ser	Pathogenic
	TP53	1	frameshift_variant	NM_000546.5:c.953_962delCAAAGAAGAA	NP_000537.3:p.Pro318HisfsTer24	Pathogenic
	TP53	1	inframe_deletion	NM_000546.5:c.965_976delCACTGGATGGAG	NP_000537.3:p.Pro322_Glu326delinsGln	Pathogenic
	TP53	1	frameshift_variant	NM_000546.5:c.946_949dupCCCC	NP_000537.3:p.Gln317ProfsTer21	Pathogenic
	TP53	1	missense_variant	NM_000546.5:c.524G>A	NP_000537.3:p.Arg175His	Pathogenic
	TP53	1	missense_variant	NM_000546.5:c.817C>T	NP_000537.3:p.Arg273Cys	Pathogenic
	TP53	1	missense_variant	NM_000546.5:c.839G>A	NP_000537.3:p.Arg280Lys	Pathogenic
	TP53	1	missense_variant	NM_000546.5:c.742C>T	NP_000537.3:p.Arg248Trp	Pathogenic
	TP53	1	missense_variant	NM_000546.5:c.464C>A	NP_000537.3:p.Thr155Asn	Pathogenic
	TP53	1	missense_variant	NM_000546.5:c.820G>T	NP_000537.3:p.Val274Phe	Pathogenic
	TP53	1	missense_variant	NM_000546.5:c.659A>G	NP_000537.3:p.Tyr220Cys	Pathogenic
Lung	KRAS	5	missense_variant	NM_033360.2:c.34G>T	NP_203524.1:p.Gly12Cys	Pathogenic
	KRAS	3	missense_variant	NM_033360.2:c.35G>T	NP_203524.1:p.Gly12Val	Pathogenic
	BRAF	2	missense_variant	NM_004333.4:c.1799T>A	NP_004324.2:p.Val600Glu	Pathogenic
	KRAS	2	missense_variant	NM_033360.2:c.38G>A	NP_203524.1:p.Gly13Asp	Pathogenic
	CDH1	1	missense_variant	NM_004360.3:c.1774G>A	NP_004351.1:p.Ala592Thr	VUS
	APC	1	missense_variant	NM_000038.5:c.3974C>T	NP_000029.2:p.Ala1325Val	VUS
	APC	1	missense_variant	NM_000038.5:c.3856G>A	NP_000029.2:p.Glu1286Lys	Pathogenic
	APC	1	frameshift_variant	NM_000038.5:c.3924delA	NP_000029.2:p.Glu1309LysfsTer12	Pathogenic
	APC	1	frameshift_variant	NM_000038.5:c.4487_4493delCTCCAGA	NP_000029.2:p.Thr1496MetfsTer9	Pathogenic
	CDH1	1	missense_variant	NM_004360.3:c.1307T>C	NP_004351.1:p.Leu436Ser	VUS
	CTNNB1	1	missense_variant	NM_001098210.1:c.110C>G	NP_001091680.1:p.Ser37Cys	Pathogenic
	EGFR	1	inframe_deletion	NM_005228.3:c.2235_2249delGGAATTAAGAGAAGC	NP_005219.2:p.Glu746_Ala750del	Pathogenic
	KRAS	1	missense_variant	NM_033360.2:c.35G>C	NP_203524.1:p.Gly12Ala	Pathogenic
	MAP2K1	1	missense_variant	NM_002755.3:c.167A>C	NP_002746.1:p.Gln56Pro	Pathogenic
	MET	1	missense_variant	NM_001127500.1:c.504G>T	NP_001120972.1:p.Glu168Asp	benign/likely benign
	MET	1	missense_variant	NM_001127500.1:c.3029C>T	NP_001120972.1:p.Thr1010Ile	VUS
	NRAS	1	missense_variant	NM_002524.4:c.65A>T	NP_002515.1:p.Gln22Leu	VUS
	PDGFRA	1	missense_variant	NM_006206.4:c.1658C>T	NP_006197.1:p.Pro553Leu	Pathogenic
	PIK3CA	1	missense_variant	NM_006218.2:c.322C>T	NP_006209.2:p.Arg108Cys	VUS
	PTEN	1	stop_gained	NM_000314.4:c.228T>A	NP_000305.3:p.Tyr76Ter	Pathogenic
	SMAD4	1	missense_variant	NM_005359.5:c.1082G>A	NP_005350.1:p.Arg361His	Pathogenic
	SMAD4	1	missense_variant	NM_005359.5:c.1489C>T	NP_005350.1:p.Arg497Cys	VUS
	STK11	1	stop_gained	NM_000455.4:c.97G>T	NP_000446.1:p.Glu33Ter	Pathogenic
	TP53	1	splice_acceptor_variant	NM_000546.5:c.920-1G>A	splicing	VUS
	TP53	1	missense_variant	NM_000546.5:c.1135C>T	NP_000537.3:p.Arg379Cys	Pathogenic
	TP53	1	missense_variant	NM_000546.5:c.773A>C	NP_000537.3:p.Glu258Ala	Pathogenic
	TP53	1	stop_gained	NM_000546.5:c.1045G>T	NP_000537.3:p.Glu349Ter	Pathogenic
	TP53	1	frameshift_variant, feature_truncation	NM_000546.5:c.532delC	NP_000537.3:p.His178ThrfsTer69	Pathogenic
	TP53	1	missense_variant	NM_000546.5:c.584T>C	NP_000537.3:p.Ile195Thr	Pathogenic
	TP53	1	missense_variant	NM_000546.5:c.479_480delTGinsAT	NP_000537.3:p.Met160Asn	Pathogenic
	TP53	1	missense_variant	NM_000546.5:c.711G>T	NP_000537.3:p.Met237Ile	Pathogenic
	TP53	1	stop_gained,splice_region_variant	NM_000546.5:c.991C>T	NP_000537.3:p.Gln331Ter	Pathogenic
	TP53	1	missense_variant	NM_000546.5:c.473G>T	NP_000537.3:p.Arg158Leu	Pathogenic
	TP53	1	missense_variant	NM_000546.5:c.743G>A	NP_000537.3:p.Arg248Gln	Pathogenic
	TP53	1	missense_variant	NM_000546.5:c.818G>A	NP_000537.3:p.Arg273His	Pathogenic
	TP53	1	missense_variant	NM_000546.5:c.869G>A	NP_000537.3:p.Arg290His	VUS
	TP53	1	missense_variant	NM_000546.5:c.1024C>G	NP_000537.3:p.Arg342Gly	VUS
	TP53	1	missense_variant	NM_000546.5:c.527G>T	NP_000537.3:p.Cys176Phe	Pathogenic
	TP53	1	splice_donor_variant	NM_000546.5:c.919+1G>T	splicing	Pathogenic
	TP53	1	missense_variant	NM_000546.5:c.469G>T	NP_000537.3:p.Val157Phe	Pathogenic
	TP53	1	missense_variant	NM_000546.5:c.517G>A	NP_000537.3:p.Val173Met	Pathogenic
Gynecologic	APC	1	missense_variant	NM_000038.5:c.3949G>C	NP_000029.2:p.Glu1317Gln	VUS
	APC	1	stop_gained	NM_000038.5:c.4588G>T	NP_000029.2:p.Glu1530Ter	Pathogenic
	BRAF	1	missense_variant	NM_004333.4:c.1799T>A	NP_004324.2:p.Val600Glu	Pathogenic
	ERBB2	1	missense_variant	NM_004448.2:c.2351G>A	NP_004439.2:p.Arg784His	Pathogenic
	FBXW7	1	missense_variant	NM_033632.3:c.1429G>A	NP_361014.1:p.Gly477Ser	VUS
	KRAS	1	missense_variant	NM_033360.2:c.35G>A	NP_203524.1:p.Gly12Asp	Pathogenic
	KRAS	1	missense_variant	NM_033360.2:c.99T>A	NP_203524.1:p.Asp33Glu	Pathogenic
	KRAS	1	missense_variant	NM_033360.2:c.35G>T	NP_203524.1:p.Gly12Val	Pathogenic
	KRAS	1	missense_variant	NM_033360.2:c.38G>A	NP_203524.1:p.Gly13Asp	Pathogenic
	MET	1	missense_variant	NM_001127500.1:c.1039G>A	NP_001120972.1:p.Ala347Thr	Pathogenic
	PIK3CA	1	missense_variant	NM_006218.2:c.3049G>C	NP_006209.2:p.Asp1017His	Pathogenic
	PIK3CA	1	missense_variant, feature_truncation	NM_006218.2:c.305_307delTTG	NP_006209.2:p.Ile102_Glu103delinsLys	VUS
	PIK3CA	1	missense_variant	NM_006218.2:c.112C>T	NP_006209.2:p.Arg38Cys	Pathogenic
	PIK3CA	1	missense_variant	NM_006218.2:c.3130A>T	NP_006209.2:p.Asn1044Tyr	VUS
	PIK3CA	1	missense_variant	NM_006218.2:c.3073A>G	NP_006209.2:p.Thr1025Ala	Pathogenic
	PIK3CA	1	missense_variant	NM_006218.2:c.370C>G	NP_006209.2:p.Pro124Ala	VUS
	PTEN	1	missense_variant	NM_000314.4:c.370T>C	NP_000305.3:p.Cys124Arg	Pathogenic
	PTEN	1	frameshift_variant, feature_truncation	NM_000314.4:c.50delA	NP_000305.3:p.Glu18ArgfsTer6	Pathogenic
	PTEN	1	frameshift_variant, feature_truncation	NM_000314.4:c.117_120delAGAA	NP_000305.3:p.Glu40AspfsTer13	Pathogenic
	SMAD4	1	missense_variant	NM_005359.5:c.1529G>A	NP_005350.1:p.Gly510Glu	Pathogenic
	TP53	1	missense_variant	NM_000546.5:c.725G>C	NP_000537.3:p.Cys242Ser	Pathogenic
	TP53	1	missense_variant	NM_000546.5:c.536A>C	NP_000537.3:p.His179Pro	Pathogenic
	TP53	1	inframe_deletion	NM_000546.5:c.792_794delACT	NP_000537.3:p.Leu265del	Pathogenic
	TP53	1	frameshift_variant	NM_000546.5:c.983_990delTCACCCTT	NP_000537.3:p.Phe328SerfsTer6	Pathogenic
	TP53	1	missense_variant	NM_000546.5:c.743G>A	NP_000537.3:p.Arg248Gln	Pathogenic
	TP53	1	stop_gained	NM_000546.5:c.916C>T	NP_000537.3:p.Arg306Ter	Pathogenic
	TP53	1	frameshift_variant, feature_truncation	NM_000546.5:c.1024delC	NP_000537.3:p.Arg342GlufsTer3	Pathogenic
	TP53	1	frameshift_variant, feature_elongation	NM_000546.5:c.983dupT	NP_000537.3:p.Thr329HisfsTer8	Pathogenic
	TP53	1	missense_variant	NM_000546.5:c.517G>C	NP_000537.3:p.Val173Leu	Pathogenic
Breast	PIK3CA	4	missense_variant	NM_006218.2:c.3140A>G	NP_006209.2:p.His1047Arg	Pathogenic
	PIK3CA	2	missense_variant	NM_006218.2:c.3140A>T	NP_006209.2:p.His1047Leu	Pathogenic
	APC	1	missense_variant	NM_000038.5:c.2673G>A	NP_000029.2:p.Met891Ile	VUS
	ERBB2	1	missense_variant	NM_004448.2:c.2327G>T	NP_004439.2:p.Gly776Val	Pathogenic
	KIT	1	missense_variant	NM_000222.2:c.1655T>C	NP_000213.1:p.Met552Thr	Pathogenic
	KRAS	1	missense_variant	NM_033360.2:c.31G>A	NP_203524.1:p.Ala11Thr	Pathogenic
	MET	1	missense_variant	NM_001127500.1:c.3029C>T	NP_001120972.1:p.Thr1010Ile	Pathogenic
	PIK3CA	1	missense_variant	NM_006218.2:c.1633G>A	NP_006209.2:p.Glu545Lys	Pathogenic
	PIK3CA	1	missense_variant	NM_006218.2:c.1637A>G	NP_006209.2:p.Gln546Arg	Pathogenic
	TP53	1	frameshift_variant, feature_truncation	NM_000546.5:c.723delC	NP_000537.3:p.Cys242AlafsTer5	Pathogenic
	TP53	1	missense_variant	NM_000546.5:c.775G>T	NP_000537.3:p.Asp259Tyr	Pathogenic
	TP53	1	missense_variant	NM_000546.5:c.853G>A	NP_000537.3:p.Glu285Lys	Pathogenic
	TP53	1	missense_variant	NM_000546.5:c.642T>G	NP_000537.3:p.His214Gln	Pathogenic
	TP53	1	missense_variant	NM_000546.5:c.770T>C	NP_000537.3:p.Leu257Pro	Pathogenic
	TP53	1	missense_variant	NM_000546.5:c.817C>T	NP_000537.3:p.Arg273Cys	Pathogenic
	TP53	1	inframe_deletion	NM_000546.5:c.316_324delAGCTACGGT	NP_000537.3:p.Ser106_Gly108delinsdel	Pathogenic
	TP53	1	missense_variant	NM_000546.5:c.646G>A	NP_000537.3:p.Val216Met	Pathogenic
	TP53	1	missense_variant	NM_000546.5:c.488A>G	NP_000537.3:p.Tyr163Cys	Pathogenic
Melanoma	BRAF	2	missense_variant	NM_004333.4:c.1799T>A	NP_004324.2:p.Val600Glu	Pathogenic
	TP53	2	missense_variant	NM_000546.5:c.215C>G	NP_000537.3:p.Pro72Arg	VUS
	BRAF	1	missense_variant	NM_004333.4:c.1798_1799delGTinsAA	NP_004324.2:p.Val600Lys	Pathogenic
	BRAF	1	missense_variant	NM_004333.4:c.1405G>C	NP_004324.2:p.Gly469Arg	Pathogenic
	CTNNB1	1	missense_variant	NM_001098210.1:c.98C>T	NP_001091680.1:p.Ser33Phe	Pathogenic
	MAP2K1	1	frameshift_variant, feature_truncation	NM_002755.3:c.173_182delAGAAGGTGGG	NP_002746.1:p.Lys59AsnfsTer2	Pathogenic
	MAP2K1	1	frameshift_variant, feature_truncation	NM_002755.3:c.167_171delAGAAG	NP_002746.1:p.Gln56ProfsTer9	Pathogenic
	NRAS	1	missense_variant	NM_002524.4:c.34G>C	NP_002515.1:p.Gly12Arg	Pathogenic
	NRAS	1	missense_variant	NM_033360.3:c38G>A	NP_002515.1:p.Gly13Asp	Pathogenic
	PDGFRA	1	missense_variant	NM_006206.4:c.2525A>T	NP_006197.1:p.Asp842Val	Pathogenic
Head and Neck	BRAF	2	missense_variant	NM_004333.4:c.1799T>A	NP_004324.2:p.Val600Glu	Pathogenic
	CDH1	1	missense_variant	NM_004360.3:c.1117C>T	NP_004351.1:p.Pro373Ser	VUS
	CDH1	1	missense_variant	NM_004360.3:c.1789C>T	NP_004351.1:p.Pro597Ser	VUS
	GNAS	1	missense_variant	NM_080425.2:c.2531G>A	NP_536350.2:p.Arg844His	Pathogenic
	KRAS	1	missense_variant	NM_033360.2:c.35G>A	NP_203524.1:p.Gly12Asp	Pathogenic
	MET	1	missense_variant	NM_001127500.1:c.1124A>G	NP_001120972.1:p.Asn375Ser	VUS
	MET	1	missense_variant	NM_001127500.1:c.3029C>T	NP_001120972.1:p.Thr1010Ile	Pathogenic
	MSH6	1	frameshift_variant	NM_000179.2:c.3312delT	NP_000170.1:p.Phe1104LeufsTer11	Pathogenic
	TP53	1	stop_gained	NM_000546.5:c.528C>A	NP_000537.3:p.Cys176Ter	Pathogenic
	TP53	1	missense_variant	NM_000546.5:c.856G>A	NP_000537.3:p.Glu286Lys	Pathogenic
	TP53	1	missense_variant	NM_000546.5:c.461G>T	NP_000537.3:p.Gly154Val	Pathogenic
	TP53	1	missense_variant	NM_000546.5:c.770T>C	NP_000537.3:p.Leu257Pro	Pathogenic
	TP53	1	missense_variant	NM_000546.5:c.821T>G	NP_000537.3:p.Val274Gly	VUS
	TP53	1	missense_variant	NM_000546.5:c.488A>G	NP_000537.3:p.Tyr163Cys	Pathogenic
Genitourinary	APC	1	missense_variant	NM_000038.5:c.4766G>A	NP_000029.2:p.Arg1589His	Pathogenic
	CDH1	1	missense_variant	NM_004360.3:c.1849G>A	NP_004351.1:p.Ala617Thr	VUS
	CTNNB1	1	missense_variant	NM_001098210.1:c.134C>G	NP_001091680.1:p.Ser45Cys	Pathogenic
	GNAS	1	missense_variant	NM_080425.2:c.2524C>T	NP_536350.2:p.Arg842Cys	VUS
	PIK3CA	1	missense_variant	NM_006218.2:c.1286T>C	NP_006209.2:p.Leu429Ser	VUS
	STK11	1	missense_variant	NM_000455.4:c.1105C>T	NP_000446.1:p.Pro369Ser	VUS
	TP53	1	missense_variant	NM_000546.5:c.707A>G	NP_000537.3:p.Tyr236Cys	Pathogenic
	TP53	1	inframe_deletion	NM_000546.5:c.643_645delAGT	NP_000537.3:p.Ser215del	VUS
	TP53	1	missense_variant	NM_000546.5:c.536A>G	NP_000537.3:p.His179Arg	Pathogenic
	TP53	1	missense_variant	NM_000546.5:c.328C>T	NP_000537.3:p.Arg110Cys	Pathogenic
	TP53	1	missense_variant	NM_000546.5:c.711G>T	NP_000537.3:p.Met237Ile	Pathogenic
CNS	APC	1	missense_variant	NM_000038.5:c.4369G>A	NP_000029.2:p.Ala1457Thr	VUS
	MET	1	missense_variant	NM_001127500.1:c.3029C>T	NP_001120972.1:p.Thr1010Ile	Pathogenic
	PIK3CA	1	start_lost	NM_006218.2:c.1A>G	NP_006209.2:p.Met1?	Pathogenic
	PTEN	1	missense_variant	NM_000314.4:c.370T>C	NP_000305.3:p.Cys124Arg	Pathogenic
Other solid tumor	CDH1	1	missense_variant	NM_004360.3:c.1774G>A	NP_004351.1:p.Ala592Thr	VUS
	KRAS	1	missense_variant	NM_033360.2:c.38G>A	NP_203524.1:p.Gly13Asp	Pathogenic
	NRAS	1	missense_variant	NM_002524.4:c.553C>T	NP_002515.1:p.Pro185Ser	VUS
	TP53	1	missense_variant	NM_000546.5:c.713G>A	NP_000537.3:p.Cys238Tyr	Pathogenic
	TP53	1	missense_variant	NM_000546.5:c.733G>A	NP_000537.3:p.Gly245Ser	Pathogenic
CNS: central nervous system, GI: gastrointestinal, HGVSc: Human Genome Variation Society coding sequence name, HGVSp: Human Genome Variation Society protein sequence name
