# Supplementary material for: Validation and clinical application of a targeted next-generation sequencing gene panel for solid and hematologic malignancies
Source: PeerJ. 2020 Oct 6;8:e10069. doi: 10.7717/peerj.10069 (PMC7546223; doi:10.7717/peerj.10069)
Supplement: Supplemental Information 11 [file peerj-08-10069-s011.xlsx]

## Sheet: Table S6
Table S6. Clinical utility of the detected variants resulted from the TsT26 sequencing
Gene symbol	Tumor type	Genetic alteration	Clinical utility (drug sensitivity/resistance, prognosis, early stage clinical trial inhibitor)	Level of evidence
AKT1*	Breast, Endometrial and Ovarian cancer	c.49G>A (p.E17K)	AZD5363	Clinical evidence
ALK*	Non-Small Cell Lung Cancer	Oncogenic Mutations	Lorlatinib, Brigatinib	FDA-approved
		c.3512T>A, c.3512_3513delinsAT (p.I1171N), c.3604G>A (p.G1202R)	Alectinib	Clinical evidence
		c.3586C>A (p.L1196M), c.3467G>A (p.C1156Y), c.3806G>C (p.G1269A)	Crizotinib	Clinical evidence
APC#
BRAF	Melanoma	c.1799T>A (p.V600E), c.1798_1799delinsAA (p.V600K)	Dabrafenib, Vemurafenib, Dabrafenib + Trametinib	FDA-approved
			Trametinib	FDA-approved
			Cobimetinib + Vemurafenib	FDA-approved
			Binimetinib + Encorafenib	FDA-approved
	Non-Small Cell Lung Cancer, Thyroid cancer	c.1799T>A (p.V600E)	Dabrafenib + Trametinib	FDA-approved
	Colorectal cancer	c.1799T>A (p.V600E)	Prognostic and survival predictor	Clinical evidence
CDH1#
CTNNB1	Advanced Solid Tumors	Oncogenic mutations	Aurora kinase inhibitor	Early stage clinical trial
EGFR	Non-Small Cell Lung Cancer	c.2248G>C (p.A750P), c.2284-5_2290dup (p.A763_Y764insFQEA), c.829_830delinsGA (p.M277E) , c.2156G>H (p.G719X), c.2239_2240delinsCC (p.L747P), c.2127_2129del (p.E709_T710delinsD), Exon 19 insertion, c.2125G>A (p.E709K), c.2497T>G (p.L833V), c.2303G>T (p.S768I), c.2582T>A (p.L861Q)	Afatinib, Erlotinib, Gefitinib	FDA-approved
		c.2369C>T (p.T790M)	Osimertinib	FDA-approved
		Exon 19 deletion, c.2573T>G (p.L858R)	Afatinib, Erlotinib, Gefitinib, Osimertinib, Dacomitinib	FDA-approved
ERBB2	Non-Small Cell Lung Cancer, Breast cancer	Oncogenic Mutations	Neratinib	Clinical evidence
FBXW7	Advanced Solid Tumors	Oncogenic mutations	Aurora kinase inhibitor	Early stage clinical trial inhibitor
FGFR2	All Solid Tumors	Oncogenic Mutations	AZD4547, BGJ398, Debio1347, Erdafitinib, Pan-FGFR inhibitor	Biological evidence, early stage clinical trial
FOXL2*#
GNAQ#
GNAS#
KIT	Gastrointestinal stromal tumor	c.1961T>C (p.V654A), c.2009C>T (p.T670I)	Sunitinib, Regorafenib	FDA-approved
		Oncogenic mutations	Imatinib, Sunitinib, Regorafenib	FDA-approved
		Exon 17 mutations	Regorafenib	FDA-approved
	Thymic tumor	Oncogenic Mutations, c.1961T>C (p.V654A), c.2009C>T (p.T670I), c.2446G>T (D816Y), exon 17 mutations	Sorafenib, Sunitinib	Standard care
KRAS	Colorectal cancer	Wild-type genotype	Cetuximab, Panitumumab, Regorafenib	FDA-approved
	Non-Small Cell Lung Cancer	Oncogenic Mutations	Resistance to EGFR TKIs	Clinical evidence
MAP2K1	Melanoma, Non-small cell lung cancer, Serous Ovarian cancer, Histiocytosis	Oncogenic Mutations	Cobimetinib, Trametinib	Clinical evidence
MET	Non-Small Cell Lung Cancer	Exon 14 Deletion, Exon 14 splice mutation	Crizotinib	Standard care
MSH6	Colorectal cancer	Oncogenic mutations	dMMR protein expression or MSI genotype	Clinical evidence
NRAS	Colorectal cancer	Wild-type genotype	Cetuximab, Panitumumab	FDA-approved
	Melanoma, Thyroid cancer, Histiocytosis	Oncogenic Mutations	Binimetinib, Binimetinib + Ribociclib	Clinical evidence
			Iodine I 131-6-Beta-Iodomethyl-19-Norcholesterol + Selumetinib	Clinical evidence
			Cobimetinib	Clinical evidence
PDGFRA	Gastrointestinal stromal tumor	Oncogenic mutations, c.2525A>T (p.D842V)	Imatinib, Dasatinib	Standard care
PIK3CA	Breast cancer	Oncogenic mutations	Alpelisib + Fulvestrant	FDA-approved
			Buparlisib + Fulvestrant, Fulvestrant + Taselisib, Alpelisib, Buparlisib, Copanlisib, GDC-0077, Serabelisib, Taselisib	Clinical evidence
PTEN	All Solid Tumors	Oncogenic Mutations	AZD8186, GSK2636771	Biological evidence
SMAD4#
SRC#
STK11#
TP53	Hematological malignancies	Oncogenic Mutations	Rituximab, Ibrutinib	Clinical evidence
*No detected variant was found for these genes. #Although detected variants were identified for these genes no clinical utility was considered a priori. TKI=tyrosine kinase inhibitor, dMMR=deficient mismatch repair, MSI=microsatellite instability
