# Supplementary material for: Validation and clinical application of a targeted next-generation sequencing gene panel for solid and hematologic malignancies
Source: PeerJ. 2020 Oct 6;8:e10069. doi: 10.7717/peerj.10069 (PMC7546223; doi:10.7717/peerj.10069)
Supplement: Supplemental Information 12 [file peerj-08-10069-s012.xlsx]

## Sheet: Table S7
Table S7. Subsequent clinical decision-making to NGS-based panel results
Patient	Histologic type	Site	Tumor type	Gene symbol	Reported variant, DNA (protein) level	Are detected variants clinically relevant?	Clinical action based on detected variant	Administered treatment considering detected variant found
2	Endometrial carcinoma	Endometrium	Gynecologic	KRAS	c.35G>T (p.G12V)	no	no	EGFR inhibitor
	Endometrial carcinoma	Endometrium	Gynecologic	PTEN	c.50delA (p.E18RfsTer6)	yes	no
	Endometrial carcinoma	Endometrium	Gynecologic	PTEN	c.117_120delAGAA (p.E40DfsTer13)	yes	no
6	Colorectal adenocarcinoma	Colon	Gastrointestinal	PIK3CA	c.1634A>C (p.E545A)	no	no	FOLFOX regimen + Cetuximab
	Colorectal adenocarcinoma	Colon	Gastrointestinal	ERBB2	c.2447G>A (p.R816H)	no	no
	Colorectal adenocarcinoma	Colon	Gastrointestinal	EGFR	c.2081C>T (p.P694L)	no	no
9	NSCLC	Lung	Lung	TP53	c.869G>A (p.R290H)	no	no	Immunotherapy
13	Endometrial carcinoma	Uterus	Gynecologic	TP53	c.725G>C (p.C242S)	no	no	Referred to genetic counselling
14	SCLC	Lymph node (mediastinum mtx)	Lung	TP53	c.991C>T (p.Q331Ter)	no	no	Lurbinectedin
	SCLC	Lymph node (mediastinum mtx)	Lung	APC	c.3974C>T (p.A1325V)	no	no
18	Lymphoma	Lymph node	Hematologic	TP53	c.817C>T (p.R273C)	yes	yes	Rituximab
21	Biliar duct carcinoma	Billiary tract	Gastrointestinal	TP53	c.742C>T (p.R248W)	no	no	FOLFOX regimen
	Biliar duct carcinoma	Billiary tract	Gastrointestinal	SMAD4	c.1546C>T (p.Q516*)	no	no
23	Mesothelioma	Lung	Other solid tumor	TP53	c.733G>A (p. G245S)	no	no	Standard chemotherapy + FGFR inhibitor
24	Plasmocytoma	Vertebrae	Hematologic	KRAS	c.180_182delTCAinsAAG (p.Q61R)	no	no	Bortezomib
	Plasmocytoma	Vertebrae	Hematologic	MET	c.1085T>C (p.M362T)	no	no
25	Colorectal adenocarcinoma	Colon	Gastrointestinal	TP53	c.818G>A (p.R273H)	no	no
	Colorectal adenocarcinoma	Colon	Gastrointestinal	KRAS	c.35G>A (p.G12D)	yes	yes	FOLFOX regimen
27	Lymphoma	Spleen	Hematologic	PIK3CA	c.1348C>T (p.H450Y)	no	no	Standard chemotherapy
	Lymphoma	Spleen	Hematologic	MET	c.504G>T (p.E168D)	no	no
28	Ovarian serous adenocarcinoma	Lymph node (ovary mtx)	Gynecologic	TP53	c.792_794delACT (p.L265del)	no	no	Immunotherapy
	Ovarian serous adenocarcinoma	Lymph node (ovary mtx)	Gynecologic	MET	c.1039G>A (p.A347T)	yes	no
30	Colorectal adenocarcinoma	Colon	Gastrointestinal	TP53	c.514G>T (p.V172F)	no	no	FOLFOX regimen + Cetuximab
	Colorectal adenocarcinoma	Colon	Gastrointestinal	APC	c.3845C>A (p.S1282*)	no	no
31	Colorectal adenocarcinoma	Colon	Gastrointestinal	TP53	c.524G>A (p.R175H)	no	no	Supportive care
32	Colorectal adenocarcinoma	Colon	Gastrointestinal	APC	c.4241delT (p.V1414EfsTer5)	no	no
	Colorectal adenocarcinoma	Colon	Gastrointestinal	PIK3CA	c.1624G>A (p.E542K)	no	no
	Colorectal adenocarcinoma	Colon	Gastrointestinal	KRAS	c.35G>A (p.G12D)	yes	yes	FOLFIRI regimen
	Colorectal adenocarcinoma	Colon	Gastrointestinal	SMAD4	c.1611C>A (p.D537E)	no	no
33	Skin melanoma	Lymph node (melanoma mtx)	Melanoma	BRAF	c.1405G>A (p.G469R)	yes	no	Immunotherapy
	Skin melanoma	Lymph node (melanoma mtx)	Melanoma	NRAS	c.34G>C (p.G12R)	yes	no
34	Myeloma	Mouth	Hematologic	APC	c.3920T>A (p.I1307K)	no	no	Supportive care
35	NSCLC	Lung	Lung	TP53	c.1135C>T (p.C176F)	no	no	Immunotherapy
	NSCLC	Lung	Lung	TP53	c.527G>T (p.R379C)	no	no
36	Urothelial carcinoma	Bladder	Genitourinary	CDH1	c.1849G>A (p.A617T)	no	no	Standard chemotherapy
38	Gastroesophagic carcinoma	Small intestine	Gastrointestinal	KIT	c.1689_1692delAAAT (p.I563MfsTer8)	yes	yes	Imatinib
41	Gastroesophagic carcinoma	Stomach	Gastrointestinal	KIT	c.[1669_1670insGGCAGGTTGA;1672_1673insGG] (p.K558_V559ins5)	yes	Medical History not available
	Gastroesophagic carcinoma	Stomach	Gastrointestinal	TP53	c.215C>G (p.P72R)	no
43	Colorectal neuroendocrine carcinoma	Colon	Gastrointestinal	TP53	c.659A>G (p.Y220C)	no	no	Standard chemotherapy
45	Lymphoma	Nose	Hematologic	FBXW7	c.1939A>C (p.K647Q)	no	no	Standard chemotherpay + radiotherapy
46	Histiocytic sarcoma	Skin	Hematologic	BRAF	c.1397G>A (p.G466E)	no	Lost to follow up
	Histiocytic sarcoma	Skin	Hematologic	KRAS	c.180_182delTCAinsAAG (p.Q61R)	no
47	Gastroesophagic carcinoma	Esophagus	Gastrointestinal	TP53	c.488A>G (p.Y163C)	no	Lost to follow up
49	Head and Neck carcinoma	Thyroid gland	Head and neck	BRAF	c.1799T>A (p.V600E)	yes	Lost to follow up
51	NSCLC	Skin (lung mtx)	Lung	TP53	c.479_480delTGinsAT (p.M160N)	no	no	Standard chemotherapy
	NSCLC	Skin (lung mtx)	Lung	KRAS	c.34G>T (p.G12C)	yes	no
	NSCLC	Skin (lung mtx)	Lung	STK11	c.97G>T (p.E33*)	no	no
52	Head and Neck carcinoma	Tongue	Head and neck	TP53	c.461G>T (p.G154V)	no	no	Cetuximab
	Head and Neck carcinoma	Tongue	Head and neck	CDH1	c.1789C>T (p.P597S)	no	no
	Head and Neck carcinoma	Tongue	Head and neck	MSH6	c.3312delT (p.F1104fsTer11)	no	no
54	NSCLC	Mediastinum	Lung	TP53	c.919+1G>T (splicing)	no	no	Immunotherapy
55	Gastroesophagic carcinoma	Esophagus	Gastrointestinal	TP53	c.499C>T (p.Q167*)	no	no	Standard chemotherapy + Ramucirumab
	Gastroesophagic carcinoma	Esophagus	Gastrointestinal	APC	c.3386T>C (p.L1129S)	no	no
	Gastroesophagic carcinoma	Esophagus	Gastrointestinal	KRAS	c.35G>A (p.G12D)	no	no
61	Colorectal adenocarcinoma	Colon	Gastrointestinal	TP53	c.839G>A (p.R280K)	no	no	Immunotherapy
	Colorectal adenocarcinoma	Colon	Gastrointestinal	KRAS	c.35G>A (p.G12D)	yes	no
62	Ovarian serous adenocarcinoma	Peritoneum (ovary mtx)	Gynecologic	TP53	c.1024delC (p.R342GTer3)	no	no	Standard chemotherapy
63	Head and Neck carcinoma	Pharynx	Head and neck	TP53	c.528C>A (p.C176*)	no	no	Radiotherapy
	Head and Neck carcinoma	Pharynx	Head and neck	KRAS	c.35G>A (p.G12D)	no	no
68	Pancreatic carcinoma	Liver (pancreas mtx)	Gastrointestinal	MET	c.1058C>T (p.S353F)	yes	yes	MET inhibitor
71	Myeloma	Soft tissue	Hematologic	TP53	c.578A>T (p.H193L)	no	no	Bortezomib
74	Unknown	Unknown	Other solid tumor	NRAS	c.553C>T (p.P185S)	no	Medical History not available
76	Cholangiocarcinoma	Billiary tract	Gastrointestinal	APC	c.4588G>T (p.E1530*)	no	no	Standard chemotherapy
	Cholangiocarcinoma	Billiary tract	Gastrointestinal	SMAD4	c.1529G>A (p.G510E)	no	no
82	Lymphoma	Lymph node	Hematologic	TP53	c.742C>T (p.R248W)	yes	Medical History not available
	Lymphoma	Lymph node	Hematologic	TP53	c.742C>T (p.S366A)	yes
	Lymphoma	Lymph node	Hematologic	STK11	c.992G>A (p.R331Q)	no
84	Colorectal adenocarcinoma	Colon	Gastrointestinal	TP53	c.524G>A (p.R175H)	no	Lost to follow up
87	Colorectal adenocarcinoma	Colon	Gastrointestinal	APC	c.4031C>G (p.S1344*)	no	no
	Colorectal adenocarcinoma	Colon	Gastrointestinal	KRAS	c.35G>A (p.G12D)	yes	yes	Standard chemotherapy
88	Ovarian serous adenocarcinoma	Ovary	Gynecologic	APC	c.3949G>C (p.E1317Q)	no	no	Immunotherapy
89	Colorectal adenocarcinoma	Colon	Gastrointestinal	BRAF	c.1799T>A (p.V600E)	yes	yes	Dabrafenib + Trametinib
91	NSCLC	Liver (lung mtx)	Lung	EGFR	c.2235_2249delGGAATTAAGAGAAGC (p.del19)	yes	yes	Erlotinib
92	Endometrial carcinoma	Endometrium	Gynecologic	PIK3CA	c.112C>T (p.R38C)	no	no	Radiotherapy
	Endometrial carcinoma	Endometrium	Gynecologic	PIK3CA	c.3130A>T (p.N1044Y)	no	no
	Endometrial carcinoma	Endometrium	Gynecologic	BRAF	c.1799T>A (p.V600E)	no	no
	Endometrial carcinoma	Endometrium	Gynecologic	KRAS	c.35G>A (p.G12D)	yes	no
	Endometrial carcinoma	Endometrium	Gynecologic	KRAS	c.38G>A (p.G13D)	yes	no
	Endometrial carcinoma	Endometrium	Gynecologic	KRAS	c.35G>A (p.D33E)	yes	no
	Endometrial carcinoma	Endometrium	Gynecologic	PTEN	c.370T>C (p.C124R)	yes	no
93	Biliar duct carcinoma	Billiary tract	Gastrointestinal	PIK3CA	c.3139C>T (p.H1047Y)	no	no	FOLFIRI regimen
96	Lymphoma	Lymph node	Hematologic	TP53	c.946_949dupCCCC (p.Q317*)	yes	Medical History not available
99	Gastroesophagic carcinoma	Stomach	Gastrointestinal	KIT	c.1670_1678delGGAAGGTTG (p.W557_V560delinsF)	no	yes	Imatinib
101	Pancreatic carcinoma	Peritoneum (pancreas mtx)	Gastrointestinal	TP53	c.916C>T (p.R306*)	no	no	Standard chemotherapy
	Pancreatic carcinoma	Peritoneum (pancreas mtx)	Gastrointestinal	KRAS	c.35G>A (p.G12D)	yes	no
104	Gastroesophagic carcinoma	Stomach	Gastrointestinal	KIT	c.2485G>C (p.A829P)	yes	yes	Regorafenib
105	Colorectal adenocarcinoma	Colon	Gastrointestinal	TP53	c.818G>A (p.R273H)	no	no
	Colorectal adenocarcinoma	Colon	Gastrointestinal	APC	c.3340C>T (p.R1114*)	no	no
	Colorectal adenocarcinoma	Colon	Gastrointestinal	APC	c.3921_3925delAAAAG (p.G1309DfsTer4)	no	no
	Colorectal adenocarcinoma	Colon	Gastrointestinal	KRAS	c.38G>A (p.G13D)	yes	yes	FOLFIRI regimen
107	Carcinoma	Breast	Breast	PIK3CA	c.1633G>A (p.E545K)	yes	no
	Carcinoma	Breast	Breast	MET	c.3029C>T (p.T1010I)	yes	yes	MET inhibitor
108	Soft tissue sarcoma	Soft tissue	Other solid tumor	KRAS	c.38G>A (p.G13D)	yes	Lost to follow up
109	Skin melanoma	Skin	Melanoma	PDGFRA	c.2525A>T (p.D842V)	no	Medical History not available
110	Ovarian serous adenocarcinoma	Lymph node (ovary mtx)	Gynecologic	TP53	c.983_990delTCACCCTT (p.F328SfsTer6)	no	no	Standard chemotherapy
111	Head and Neck carcinoma	Parotid gland	Head and neck	CDH1	c.1117C>T (p.P373S)	no	Lost to follow up
114	Urothelial carcinoma	Ureter	Genitourinary	TP53	c.707A>G (p.Y236C)	no	no	Pan FGFR inhibitor
116	Carcinoma	Skin (breast mtx)	Breast	TP53	c.488A>G (p.Y163C)	no	no	Standard chemotherapy + Radiotherapy
117	Ovarian serous adenocarcinoma	Uterus (ovary mtx)	Gynecologic	TP53	c.536A>C (p.H179P)	no	no	Standard chemotherapy
	Ovarian serous adenocarcinoma	Uterus (ovary mtx)	Gynecologic	PIK3CA	c.3049G>C (p.D1017H)	no	no
120	Histiocytosis	Skin	Hematologic	BRAF	c.1799T>A (p.V600E)	no	no	Metotrexate
121	Soft tissue sarcoma	Unknown	Other solid tumor	TP53	c.713G>A (p.C238Y)	no	no	Supportive care
	Soft tissue sarcoma	Unknown	Other solid tumor	CDH1	c.1774G>A (p.A592T)	no	no
124	Gastroesophagic carcinoma	Stomach	Gastrointestinal	TP53	c.700T>A (p.Y234N)	no	no	Standard chemotherapy
125	Head and Neck carcinoma	Tongue	Head and neck	TP53	c.856G>A (p.E286K)	no	no	Standard chemotherapy + Cetuximab
129	Lymphoma	Amygdala	Hematologic	TP53	c.856G>A (p.E286K)	yes	yes	Idelalisib + Rituximab
	Lymphoma	Amygdala	Hematologic	MET	c.1640G>A (p.R547Q)	no	no
130	Head and Neck carcinoma	Larynx	Head and neck	TP53	c.488A>G (p.Y163C)	no	no	Immunotherapy
132	Colorectal adenocarcinoma	Colon	Gastrointestinal	TP53	c.532C>G (p.H178D)	no	no	Panitumumab
	Colorectal adenocarcinoma	Colon	Gastrointestinal	BRAF	c.1790T>G (p.L597R)	no	no
	Colorectal adenocarcinoma	Colon	Gastrointestinal	FBXW7	c.1792A>T (p.N598Y)	yes	no
134	Colorectal adenocarcinoma	Colon	Gastrointestinal	TP53	c.733G>A (p.G245S)	no	no
	Colorectal adenocarcinoma	Colon	Gastrointestinal	APC	c.2626C>T (p.R876*)	no	no
	Colorectal adenocarcinoma	Colon	Gastrointestinal	PIK3CA	c.1313C>T (p.S438F)	no	no
	Colorectal adenocarcinoma	Colon	Gastrointestinal	KRAS	c.35G>T (p.G12V)	yes	yes	Irinotecan
137	Glial tumor	Brain	Central nervous system	MET	c.3029C>T (p.T1010I)	yes	yes	MET inhibitor but no recruited due to disease worsening
138	Urothelial carcinoma	Bladder	Genitourinary	TP53	c.818G>A (p.R273H)	no	no	Standard chemotherapy
139	Skin melanoma	Skin	Melanoma	MAP2K1	c.167_171delAGAAG (p.Q56PfsTer9)	yes	Medical History not available
	Skin melanoma	Skin	Melanoma	MAP2K1	c.173_182delAGAAGGTGGG (p.K59NfsTer2)	yes
	Skin melanoma	Skin	Melanoma	CTNNB1	c.98C>T (p.S33F)	yes
141	Adrenal carcinoma	Suprarenal gland	Genitourinary	APC	c.4766G>A (p.R1589H)	no	no	Standard chemotherapy
	Adrenal carcinoma	Suprarenal gland	Genitourinary	PIK3CA	c.1286T>C (p.L429S)	no	no
143	NSCLC	Mediastinum	Lung	TP53	c.1024C>G (p.R342G)	no	no	Standard chemotherapy
	NSCLC	Mediastinum	Lung	TP53	c.773A>C (p.E258A)	no	no
	NSCLC	Mediastinum	Lung	MAP2K1	c.167A>C (p.Q56P)	yes	no
144	Colorectal adenocarcinoma	Colon	Gastrointestinal	TP53	c.817C>T (p.R273C)	no	no
	Colorectal adenocarcinoma	Colon	Gastrointestinal	TP53	c.734G>A (p.G245D)	no	no
	Colorectal adenocarcinoma	Colon	Gastrointestinal	KRAS	c.38G>A (p.G13D)	yes	yes	FOLFOX regimen + Bevacizumab
	Colorectal adenocarcinoma	Colon	Gastrointestinal	NRAS	c.173C>T (p.I58T)	yes	yes
	Colorectal adenocarcinoma	Colon	Gastrointestinal	SMAD4	c.1487G>A (p.R496H)	no	no
	Colorectal adenocarcinoma	Colon	Gastrointestinal	KIT	c.1478C>A (p.A493D)	no	no
145	Colorectal adenocarcinoma	Colon	Gastrointestinal	TP53	c.733G>A (p.G245S)	no	no
	Colorectal adenocarcinoma	Colon	Gastrointestinal	APC	c.4067C>G (p.S1536*)	no	no
	Colorectal adenocarcinoma	Colon	Gastrointestinal	KRAS	c.436G>A (p.A146T)	yes	yes	mFOLFOX6 regimen + Bevacizumab
147	Carcinoma	Brain (breast mtx)	Breast	KIT	c.1655T>C (p.M552T)	no	no	Standard chemotherapy
149	Colorectal adenocarcinoma	Lymph node (colon mtx)	Gastrointestinal	APC	c.4245delT (p.S1415RfsTer4)	no	Medical History not available
	Colorectal adenocarcinoma	Lymph node (colon mtx)	Gastrointestinal	KRAS	c.436G>A (p.A146T)	yes
153	Pancreatic carcinoma	Pancreas	Gastrointestinal	TP53	c.796G>T (p.G266*)	no	no	Aurora kinase inhibitor
	Pancreatic carcinoma	Pancreas	Gastrointestinal	APC	c.2561G>A (p.R854K)	no	no
	Pancreatic carcinoma	Pancreas	Gastrointestinal	KRAS	c.35G>A (p.G12D)	no	no
	Pancreatic carcinoma	Pancreas	Gastrointestinal	KIT	c.2596+1G>A	no	no
154	Gastroesophagic carcinoma	Esophagus	Gastrointestinal	TP53	c.596G>T (p.G199V)	no	no	BET inhibitor
	Gastroesophagic carcinoma	Esophagus	Gastrointestinal	CTNNB1	c.98C>G (p.S33C)	yes	no
155	NSCLC	Lung	Lung	TP53	c.920-1G>A	no	Medical History not available
	NSCLC	Lung	Lung	MET	c.3029C>T (p.T1010I)	yes
158	Carcinoma	Breast	Breast	TP53	c.646G>A (p.V216M)	no	no	Standard chemotherapy + Radiotherapy
	Carcinoma	Breast	Breast	PIK3CA	c.3140A>G (p.H1047R)	yes	no
165	Vulvar carcinoma	Vulva	Gynecologic	TP53	c.517G>C (p.V173L)	no	no	Supportive care
166	Head and Neck carcinoma	Thyroid gland	Head and neck	BRAF	c.1799T>A (p.V600E)	yes	Lost to follow up
167	NSCLC	Lymph node (lung mtx)	Lung	TP53	c.473G>T (p.R158L)	no	no	Standard chemotherapy
	NSCLC	Lymph node (lung mtx)	Lung	KRAS	c.34G>T (p.G12C)	yes	no
168	Gastroesophagic carcinoma	Esophagus	Gastrointestinal	TP53	c.490A>G (p.K164E)	no	Lost to follow up
169	Lymphoma	Lymph node	Hematologic	ERBB2	c.2348C>T (p.S783F)	no	Lost to follow up
170	Carcinoma	Breast	Breast	TP53	c.723delC (p.C242ATer5)	no	no	Standard chemotherapy
	Carcinoma	Breast	Breast	PIK3CA	c.3140A>G (p.H1047R)	yes	no
171	Histiocytic sarcoma	Small intestine	Hematologic	KRAS	c.37G>T (p.G13C)	no	Medical History not available
173	Colorectal adenocarcinoma	Colon	Gastrointestinal	TP53	c.733G>A (p.G245S)	no	Lost to follow up
	Colorectal adenocarcinoma	Colon	Gastrointestinal	PIK3CA	c.1633G>A (p.E545K)	no
	Colorectal adenocarcinoma	Colon	Gastrointestinal	PTEN	c.370T>G (p.C124G)	no
176	Biliar duct carcinoma	Billiary tract	Gastrointestinal	KRAS	c.35G>A (p.G12D)	no	Lost to follow up
181	Colorectal adenocarcinoma	Colon	Gastrointestinal	TP53	c.374C>T (p.T125M)	no	no
	Colorectal adenocarcinoma	Colon	Gastrointestinal	APC	c.2684C>G (p.S895*)	no	no
	Colorectal adenocarcinoma	Colon	Gastrointestinal	APC	c.4285C>T (p.Q1429*)	no	no
	Colorectal adenocarcinoma	Colon	Gastrointestinal	KRAS	c.35G>T (p.G12V)	yes	yes	FOLFOX regimen + Bevacizumab
182	Colorectal adenocarcinoma	Liver (colon mtx)	Gastrointestinal	TP53	c.1501G>A (p.R248Q)	no	no	FOLFIRI regimen + Cetuximab
	Colorectal adenocarcinoma	Liver (colon mtx)	Gastrointestinal	SMAD4	c.1070_1087dupCTGGAGGAGATCGCTTTT (p.P356-P566 DRF)	no	no
183	Skin melanoma	Skin	Melanoma	BRAF	c.1799T>A (p.V600E)	yes	yes	Dabrafenib + Trametinib
	Skin melanoma	Skin	Melanoma	TP53	c.215C>G (p.P72R)	no	no
185	Colorectal adenocarcinoma	Colon	Gastrointestinal	APC	c.4216C>T (p.Q1406*)	no	no
	Colorectal adenocarcinoma	Colon	Gastrointestinal	PIK3CA	c.3140A>G (p.H1047R)	no	no
	Colorectal adenocarcinoma	Colon	Gastrointestinal	PIK3CA	c.248T>G (p.F83C)	no	no
	Colorectal adenocarcinoma	Colon	Gastrointestinal	KRAS	c.35G>A (p.G12D)	yes	yes	mFOLFOX6 regimen
187	Cervical carcinoma	Cervix	Gynecologic	PIK3CA	c.305_307delTTG (p.I102_E103delinsK)	no	no	Supportive care
188	Lung neuroendocrine carcinoma	Mediastinum	Lung	TP53	c.469G>T (p.V157F)	no	no	Immunotherapy
189	Histiocytosis	Soft tissue	Hematologic	NRAS	c.504G>A (p.M168I)	no	Medical History not available
190	Leukemia	Lymph node	Hematologic	TP53	c.659A>G (p.Y220C)	yes	yes	Ibrutinib
	Leukemia	Lymph node	Hematologic	BRAF	c.1405G>C (p.G469R)	no	no
193	NSCLC	Lung	Lung	TP53	c.1045G>T (p.E349*)	no	Lost to follow up
	NSCLC	Lung	Lung	KRAS	c.35G>T (p.G12V)	yes
194	Colorectal adenocarcinoma	Colon	Gastrointestinal	KRAS	c.35G>A (p.G12D)	yes	yes	FOLFIRI regimen + Bevacizumab
	Colorectal adenocarcinoma	Colon	Gastrointestinal	CTNNB1	c.121A>G (p.T41A)	yes	no
196	Colorectal adenocarcinoma	Colon	Gastrointestinal	TP53	c.524G>A (p.R175H)	no	no
	Colorectal adenocarcinoma	Colon	Gastrointestinal	APC	c.4348C>T (p.R1450*)	no	no
	Colorectal adenocarcinoma	Colon	Gastrointestinal	KRAS	c.35G>A (p.G12D)	yes	yes	mFOLFOX6 regimen + Bevacizumab
197	Gastroesophagic carcinoma	Stomach	Gastrointestinal	TP53	c.434T>A (p.L145Q)	no	no	FOLFOX regimen
198	Soft tissue sarcoma	Jaw	Other solid tumor	TP53	c.770T>C (p.L257P)	no	Lost to follow up
	Soft tissue sarcoma	Jaw	Other solid tumor	MET	c.1124A>G (p.N375S)	yes
	Soft tissue sarcoma	Jaw	Other solid tumor	GNAS	c.2531G>A (p.R844H)	no
199	Skin melanoma	Pleura (melanoma mtx)	Melanoma	BRAF	c.1799T>A (p.V600E)	yes	yes	Dabrafenib + Trametinib
205	Colorectal adenocarcinoma	Liver (colon mtx)	Gastrointestinal	TP53	c.1501G>A (p.R248Q)	no	no
	Colorectal adenocarcinoma	Liver (colon mtx)	Gastrointestinal	APC	c.4348C>T (p.R1450*)	no	no
	Colorectal adenocarcinoma	Liver (colon mtx)	Gastrointestinal	KRAS	c.38G>A (p.G13D)	yes	yes	FOLFIRI regimen + Bevacizumab
206	Ovarian serous adenocarcinoma	Colon (mtx ovary)	Gynecologic	TP53	c.916C>T (p.R306*)	no	no
	Ovarian serous adenocarcinoma	Colon (mtx ovary)	Gynecologic	ERBB2	c.2351G>A (p.R784H)	yes	yes	Neratinib
208	Colorectal adenocarcinoma	Colon	Gastrointestinal	KRAS	c.182_183invAA (p.Q61L)	yes	yes	mFOLFOX6 regimen + Bevacizumab
209	Skin melanoma	Skin	Melanoma	BRAF	c.1798_1799delGTinsAA (p.V600K)	yes	no	Supportive care
	Skin melanoma	Skin	Melanoma	NRAS	c38G>A (p.G13D)	yes	no
	Skin melanoma	Skin	Melanoma	TP53	c.215C>G (p.P72R)	no	no
212	Glial tumor	Brain	Central nervous system	APC	c.4369G>A (p.A1457T)	no	Medical History not available
213	Lymphoma	Lymph node	Hematologic	TP53	c.820G>T (p.V274F)	yes	Medical History not available
214	NSCLC	Lung	Lung	TP53	c.711G>T (p.M237I)	no	no	Radiotherapy
	NSCLC	Lung	Lung	APC	c.3924delA (p.I1307X)	no	no
	NSCLC	Lung	Lung	KRAS	c.38G>A (p.G13D)	yes	no
	NSCLC	Lung	Lung	KRAS	c.34G>T (p.G12C)	yes	no
	NSCLC	Lung	Lung	PTEN	c.228T>A (p.Y16*)	yes	no
218	Biliar duct carcinoma	Billiary tract	Gastrointestinal	NRAS	c.203G>A (p.R68K)	yes	no	FOLFOX regimen
219	Head and Neck carcinoma	Thyroid gland	Head and neck	TP53	c.821T>G (p.V274G)	no	no
	Head and Neck carcinoma	Thyroid gland	Head and neck	MET	c.3029C>T (p.T1010I)	yes	yes	Capmatinib
220	NSCLC	Lung	Lung	CTNNB1	c.110C>G (p.S37C)	yes	yes	Aurora kinase inhibitor
221	Colorectal adenocarcinoma	Colon	Gastrointestinal	APC	c.3921_3925delAAAAG (p.E1309DfsTer4)	no	no	FOLFIRI regimen + Cetuximab
	Colorectal adenocarcinoma	Colon	Gastrointestinal	APC	c.3927_3931delAAAGA (p.P1091S)	no	no
	Colorectal adenocarcinoma	Colon	Gastrointestinal	SMAD4	c.1082G>A (p.R361H)	no	yes
	Colorectal adenocarcinoma	Colon	Gastrointestinal	ERBB2	c.2342A>G (p.Y781C)	no	no
	Colorectal adenocarcinoma	Colon	Gastrointestinal	GNAQ	c.589C>T (p.Q197*)	no	no
225	Colorectal adenocarcinoma	Colon	Gastrointestinal	TP53	c.523C>G (p.R175G)	no	no
	Colorectal adenocarcinoma	Colon	Gastrointestinal	KRAS	c.436G>A (p.A146T)	yes	yes	Standard chemotherapy
229	Colorectal adenocarcinoma	Colon	Gastrointestinal	TP53	c.1009C>T (p.R337C)	no	no
	Colorectal adenocarcinoma	Colon	Gastrointestinal	KRAS	c.34G>A (p.G12S)	yes	yes	FOLFOX regimen
230	Pancreatic neuroendocrine carcinoma	Pancreas	Gastrointestinal	MET	c.504G>T (p.E168D)	yes	no	Everolimus
231	Colorectal adenocarcinoma	Liver (colon mtx)	Gastrointestinal	TP53	c.723delC (p.C242ATer5)	no	no
	Colorectal adenocarcinoma	Liver (colon mtx)	Gastrointestinal	KRAS	c.35G>A (p.G12D)	yes	no
	Colorectal adenocarcinoma	Liver (colon mtx)	Gastrointestinal	KIT	c.2494C>T (p.P832S)	yes	yes	Regorafenib
	Colorectal adenocarcinoma	Liver (colon mtx)	Gastrointestinal	SRC	c.1574C>T (p.S525F)	no	no
233	Hepatocarcinoma	Liver	Gastrointestinal	TP53	c.736A>T (p.M246L)	no	no	EGFR inhibitor
234	NSCLC	Lung	Lung	KRAS	c.35G>T (p.G12V)	yes	no	Immunotherapy
237	Pancreatic carcinoma	Liver (pancreas mtx)	Gastrointestinal	KRAS	c.35G>A (p.G12D)	yes	Lost to follow up
	Pancreatic carcinoma	Liver (pancreas mtx)	Gastrointestinal	GNAS	c.2530C>T (p.R844C)	no
238	Lymphoma	Lymph node	Hematologic	PTEN	c.107G>A (p.G36E)	no	Medical History not available
	Lymphoma	Lymph node	Hematologic	MET	c.1085T>C (p.M362T)	no
239	Colorectal adenocarcinoma	Colon	Gastrointestinal	PIK3CA	c.436G>A (p.V146I)	no	no
	Colorectal adenocarcinoma	Colon	Gastrointestinal	KRAS	c.38G>A (p.G13D)	yes	yes	Standard chemotherapy
	Colorectal adenocarcinoma	Colon	Gastrointestinal	CTNNB1	c.107A>C (p.H36P)	yes	no
240	Ovarian serous adenocarcinoma	Colon (ovary mtx)	Gynecologic	PIK3CA	c.3140A>T (p.H1047L)	no	no	Supportive care
	Ovarian serous adenocarcinoma	Colon (ovary mtx)	Gynecologic	MET	c.504G>T (p.E168D)	yes	no
242	Gastroesophagic carcinoma	Esophagus	Gastrointestinal	TP53	c.844C>T (p.R282W)	no	no	FOLFIRI regimen
244	Pancreatic carcinoma	Pancreas	Gastrointestinal	TP53	c.536A>G (p.H179R)	no	no
	Pancreatic carcinoma	Pancreas	Gastrointestinal	APC	c.2653G>A (p.A885T)	no	no	Supportive care
	Pancreatic carcinoma	Pancreas	Gastrointestinal	KRAS	c.35G>A (p.G12D)	no	no
	Pancreatic carcinoma	Pancreas	Gastrointestinal	SMAD4	c.1519A>G (p.K507E)	no	no
245	Colorectal adenocarcinoma	Peritoneum (colon mtx)	Gastrointestinal	TP53	c.1501G>A (p.R248Q)	no	no
	Colorectal adenocarcinoma	Peritoneum (colon mtx)	Gastrointestinal	KRAS	c.35G>T (p.G12V)	yes	yes	FOLFIRI regimen + Aflibercept
	Colorectal adenocarcinoma	Peritoneum (colon mtx)	Gastrointestinal	FBXW7	c.1501G>A (p.V501I)	yes	no
246	Glial tumor	Brain	Central nervous system	PIK3CA	c.1A>G (p.M1del)	no	Lost to follow up
	Glial tumor	Brain	Central nervous system	PTEN	c.370T>C (p.C124R)	no
247	Gastroesophagic carcinoma	Ovary (stomach mtx)	Gastrointestinal	CDH1	c.1774G>A (p.A592T)	no	no	Standard chemotherapy
248	Pancreatic carcinoma	Pancreas	Gastrointestinal	TP53	c.733G>A (p.G245S)	no	no	PTEFb inhibitor
	Pancreatic carcinoma	Pancreas	Gastrointestinal	KRAS	c.34G>C (p.G12R)	yes	no
	Pancreatic carcinoma	Pancreas	Gastrointestinal	MET	c.504G>T (p.E168D)	yes	no
250	Colorectal adenocarcinoma	Colon	Gastrointestinal	APC	c.2626C>T (p.R876*)	no	no
	Colorectal adenocarcinoma	Colon	Gastrointestinal	PIK3CA	c.1633G>A (p.E545K)	no	no
	Colorectal adenocarcinoma	Colon	Gastrointestinal	KRAS	c.35G>T (p.G12V)	yes	yes	FOLFOX9 regimen
253	Pancreatic carcinoma	Pancreas	Gastrointestinal	KRAS	c.35G>A (p.G12D)	no	no	Standard chemotherapy
254	Carcinoma	Skin (breast mtx)	Breast	TP53	c.316_324delAGCTACGGT (p.S106_G108delinsdel)	no	no	Standard chemotherapy
255	Urothelial carcinoma	Bladder	Genitourinary	GNAS	c.2524C>T (p.R842C)	no	Lost to follow up
258	NSCLC	Lung	Lung	TP53	c.517G>A (p.V173M)	no	no	Standard chemotherapy
260	Adrenal carcinoma	Suprarenal gland	Genitourinary	TP53	c.643_645delAGT (p.S215del)	no	no	Supportive care
	Adrenal carcinoma	Suprarenal gland	Genitourinary	CTNNB1	c.134C>G (p.S45C)	yes	no
	Adrenal carcinoma	Suprarenal gland	Genitourinary	STK11	c.1105C>T (p.P369S)	no	no
263	Ovarian serous adenocarcinoma	Bladder (ovary mtx)	Gynecologic	PIK3CA	c.370C>G (p.P124A)	no	no	Supportive care
266	Carcinoma	Breast	Breast	TP53	c.642T>G (p.H214Q)	yes	yes	Radiotherapy (referred to genetic counselling to study plausible Li-Fraumeni syndrome)
	Carcinoma	Breast	Breast	PIK3CA	c.3140A>G (p.H1047R)	yes	no
	Carcinoma	Breast	Breast	PIK3CA	c.3140A>T (p.H1047L)	yes	no
273	Colorectal adenocarcinoma	Colon	Gastrointestinal	TP53	c.524G>A (p.R175H)	no	no	Cetuximab
	Colorectal adenocarcinoma	Colon	Gastrointestinal	APC	c.3880C>T (p.Q1294*)	no	no
276	NSCLC	Lung	Lung	TP53	c.1501G>A (p.R248Q)	no	no	Standard chemotherapy
	NSCLC	Lung	Lung	APC	c.4487_4493delCTCCAGA (p.T1496MfsTer9)	no	no
	NSCLC	Lung	Lung	KRAS	c.38G>A (p.G13D)	yes	no
277	Leukemia	Lymph node	Hematologic	TP53	c.482C>A (p.A161D)	yes	yes	Ibrutinib
278	Ovarian serous adenocarcinoma	Spleen (ovary mtx)	Gynecologic	FBXW7	c.1429G>A (p.G477S)	yes	no	Standard chemotherapy
284	Gastroesophagic carcinoma	Liver (GIST mtx)	Gastrointestinal	MET	c.504G>T (p.E168D)	yes	no
	Gastroesophagic carcinoma	Liver (GIST mtx)	Gastrointestinal	KIT	c.1961T>C (p.V654A)	yes	yes	Regorafenib
286	Lymphoma	Skin	Hematologic	NRAS	c.181C>A (p.Q61K)	no	no	Supportive care
287	Lymphoma	Lymph node	Hematologic	TP53	c.742C>T (p.R248W)	yes	yes	Ibrutinib
289	NSCLC	Pleura	Lung	CDH1	c.1307T>C (p.L436S)	no	no	Radiotherapy
290	Lymphoma	Colon	Hematologic	TP53	c.742C>T (p.R248W)	yes	yes	Lost to follow up
291	Colorectal adenocarcinoma	Colon	Gastrointestinal	APC	c.4660_4661insA (p.T1556N*)	no	no
	Colorectal adenocarcinoma	Colon	Gastrointestinal	PIK3CA	c.1636C>A (p.Q546K)	no	no
	Colorectal adenocarcinoma	Colon	Gastrointestinal	KRAS	c.36_38dupTGG (p.G12dup)	yes	yes	FOLFOX regimen
292	Carcinoma	Lymph node (breast mtx)	Breast	TP53	c.775G>T (p.D259Y)	no	no	Radiotherapy
	Carcinoma	Lymph node (breast mtx)	Breast	APC	c.2673G>A (p.M891I)	no	no
294	Endometrial carcinoma	Endometrium	Gynecologic	TP53	c.1501G>A (p.R248Q)	no	no	Supportive care
299	NSCLC	Lung	Lung	TP53	c.818G>A (p.R273H)	no	no	Standard chemotherapy
	NSCLC	Lung	Lung	PIK3CA	c.322C>T (p.R108C)	no	no
	NSCLC	Lung	Lung	KRAS	c.35G>C (p.G12A)	yes	no
306	Carcinoma	Breast	Breast	TP53	c.856G>A (p.E285K)	no	no	Supportive care
307	Leukemia	Lymph node	Hematologic	APC	c.3386T>C (p.L1129S)	no	no	BTK inhibitor
308	Leukemia	Lymph node	Hematologic	TP53	c.524G>A (p.R175H)	yes	yes	Ibrutinib
311	Carcinoma	Breast	Breast	KRAS	c.31G>A (p.A11T)	no	no	Standard chemotherapy
312	Lymphoma	Lymph node	Hematologic	APC	c.3949G>C (p.E1317Q)	no	Medical History not available
	Lymphoma	Lymph node	Hematologic	PTEN	c.81T>G (p.Y27*)	no
316	NSCLC	Lung	Lung	TP53	c.584T>C (p.I195T)	no	Lost to follow up
	NSCLC	Lung	Lung	KRAS	c.35G>T (p.G12V)	yes
	NSCLC	Lung	Lung	SMAD4	c.1082G>A (p.R361H)	no
317	NSCLC	Mediastinum	Lung	APC	c.3856G>A (p.E1286K)	no	no	Standard chemotherapy + Radiotherapy
318	Lymphoma	Lymph node	Hematologic	TP53	c.716A>G (p.N239S)	yes	no	Radiotherapy
319	Colorectal adenocarcinoma	Liver (colon mtx)	Gastrointestinal	TP53	c.347delC (p.S116LfsTer7)	no	no
	Colorectal adenocarcinoma	Liver (colon mtx)	Gastrointestinal	FBXW7	c.1780C>T (p.L594F)	yes	yes	Aurora kinase inhibitor
323	Lymphoma	Lymph node	Hematologic	TP53	c.839G>A (p.R280K)	yes	Medical History not available
326	NSCLC	Mediastinum	Lung	BRAF	c.1799T>A (p.V600E)	yes	no	Immunotherapy
328	NSCLC	Lung	Lung	KRAS	c.34G>T (p.G12C)	yes	no	Immunotherapy
	NSCLC	Lung	Lung	CDH1	c.1774G>A (p.A592T)	no	no
329	Gastroesophagic carcinoma	Esophagus	Gastrointestinal	TP53	c.584delT (p.I195del)	no	no	Standard chemotherapy
	Gastroesophagic carcinoma	Esophagus	Gastrointestinal	APC	c.2673G>A (p.M891I)	no	no
331	Carcinoma	Breast	Breast	TP53	c.770T>C (p.L257P)	no	no	Aurora kinase inhibitor
	Carcinoma	Breast	Breast	PIK3CA	c.3140A>G (p.H1047R)	yes	no
338	Pancreatic carcinoma	Pancreas	Gastrointestinal	KRAS	c.35G>T (p.G12V)	no	no	Radiotherapy
340	Colorectal adenocarcinoma	Colon	Gastrointestinal	MET	c.3334C>T (p.H1112Y)	yes	no	FOLFIRI regimen + Cetuximab
341	Carcinoma	Skin (breast mtx)	Breast	TP53	c.817C>T (p.R273C)	no	no	Standard chemotherapy + Radiotherapy
342	Carcinoma	Breast	Breast	PIK3CA	c.3140A>T (p.H1047L)	yes	yes	Taselisib
345	Leukemia	Colon	Hematologic	TP53	c.965_976delCACTGGATGGAG (p.P322_E326delinsQ)	yes	yes	Ibrutinib
	Leukemia	Colon	Hematologic	TP53	c.953_962delCAAAGAAGAA (p.P318HfsTer24)	yes	yes
	Leukemia	Colon	Hematologic	TP53	c.536A>G (p.H179R)	yes	yes
	Leukemia	Colon	Hematologic	MSH6	c.3267A>T (p.L1089F)	no	no
346	NSCLC	Pleura	Lung	BRAF	c.1799T>A (p.V600E)	yes	yes	Dabrafenib + Trametinib
353	NSCLC	Pericardium fluid (lung mtx)	Lung	MET	c.504G>T (p.E168D)	yes	no	Immunotherapy
356	Urothelial carcinoma	Bladder	Genitourinary	TP53	c.536A>G (p.H179R)	no	no	Standard chemotherapy
	Urothelial carcinoma	Bladder	Genitourinary	TP53	c.328C>T (p.R110C)	no	no
357	Gastroesophagic carcinoma	Stomach	Gastrointestinal	PIK3CA	c.300_311delAGTAATTGAACC (p.V101_P104del)	no	no	EGFR inhibitor
	Gastroesophagic carcinoma	Stomach	Gastrointestinal	BRAF	c.1801A>G (p.K601E)	no	no
362	Carcinoma	Breast	Breast	PIK3CA	c.1637A>G (p.Q546R)	yes	no
	Carcinoma	Breast	Breast	ERBB2	c.2327G>T (p.G776V)	yes	yes	Neratinib
365	NSCLC	Brain (lung mtx)	Lung	KRAS	c.34G>T (p.G12C)	yes	no	Standard chemotherpay + radiotherapy
	NSCLC	Brain (lung mtx)	Lung	SMAD4	c.1489C>T (p.R497C)	no	no
	NSCLC	Brain (lung mtx)	Lung	PDGFRA	c.1658C>T (p.P553L)	no	no
366	Pancreatic carcinoma	Pancreas	Gastrointestinal	APC	c.3949G>C (p.E1317Q)	no	no	Standard chemotherapy
367	Gastroesophagic carcinoma	Stomach	Gastrointestinal	APC	c.2626C>T (p.R876*)	no	no	Immunotherapy
	Gastroesophagic carcinoma	Stomach	Gastrointestinal	KRAS	c.34G>A (p.G12S)	no	no
368	Gastroesophagic carcinoma	Stomach	Gastrointestinal	TP53	c.574C>T (p.Q192*)	no	no	Standard chemotherapy
	Gastroesophagic carcinoma	Stomach	Gastrointestinal	PTEN	c.632G>A (p.C211Y)	yes	no
	Gastroesophagic carcinoma	Stomach	Gastrointestinal	KIT	c.2484C>T (p.N828=)	no	no
370	Lymphoma	Lymph node	Hematologic	TP53	c.464C>A (p.T155N)	yes	yes	Rituximab
	Lymphoma	Lymph node	Hematologic	ERBB2	c.1960A>G (p.I654V)	no	no
377	Ovarian serous adenocarcinoma	Ovary	Gynecologic	TP53	c.983dupT (p.T329fs*8)	no	no	Immunotherapy
378	SCLC	Mediastinum	Lung	TP53	c.532delC (p.H178*)	no	no	BET inhibitor
	SCLC	Mediastinum	Lung	NRAS	c.65A>T (p.Q22L)	yes	no
380	Pancreatic carcinoma	Pancreas	Gastrointestinal	APC	c.2561G>A (p.R854K)	no	no	Lost to follow up
	Pancreatic carcinoma	Pancreas	Gastrointestinal	KRAS	c.183A>C (p.Q61H)	yes	no
	Pancreatic carcinoma	Pancreas	Gastrointestinal	PTEN	c.8C>T (p.A3V)	yes	no
	Pancreatic carcinoma	Pancreas	Gastrointestinal	CTNNB1	c.47C>T (p.P16L)	yes	no
383	Cervical carcinoma	Cervix	Gynecologic	PIK3CA	c.3073A>G (p.T1025A)	no	no	Immunotherapy
388	Ovarian serous adenocarcinoma	Ovary	Gynecologic	TP53	c.916C>T (p.R306*)	no	no	Supportive care
389	Colorectal adenocarcinoma	Colon	Gastrointestinal	APC	c.3238_3239delGA (p.S1081HfsTer2)	no	Medical History not available
	Colorectal adenocarcinoma	Colon	Gastrointestinal	APC	c.4222G>T (p.E1408*)	no
	Colorectal adenocarcinoma	Colon	Gastrointestinal	PIK3CA	c.353G>A (p.G118D)	no
	Colorectal adenocarcinoma	Colon	Gastrointestinal	BRAF	c.1406G>C (p.G469A)	yes
	Colorectal adenocarcinoma	Colon	Gastrointestinal	KRAS	c.40G>A (p.V14I)	yes
	Colorectal adenocarcinoma	Colon	Gastrointestinal	MET	c.3029C>T (p.T1010I)	yes
	Colorectal adenocarcinoma	Colon	Gastrointestinal	FBXW7	c.1177C>T (p.R393*)	yes
	Colorectal adenocarcinoma	Colon	Gastrointestinal	GNAS	c.2531G>A (p.R844H)	no
390	Colorectal adenocarcinoma	Colon	Gastrointestinal	TP53	c.637C>T (p.R213*)	no	Medical History not available
	Colorectal adenocarcinoma	Colon	Gastrointestinal	APC	c.3921_3925delAAAAG (p.E1309DfsTer4)	no
	Colorectal adenocarcinoma	Colon	Gastrointestinal	KRAS	c.35G>T (p.G12V)	yes
	Colorectal adenocarcinoma	Colon	Gastrointestinal	FBXW7	c.1393C>T (p.R465C)	yes
391	Colorectal adenocarcinoma	Colon	Gastrointestinal	KRAS	c.35G>T (p.G12V)	yes	Medical History not available
392	Colorectal adenocarcinoma	Colon	Gastrointestinal	APC	c.3921_3925delAAAAG (p.E1309DfsTer4)	no	Medical History not available
	Colorectal adenocarcinoma	Colon	Gastrointestinal	KRAS	c.35G>A (p.G12D)	yes
393	Colorectal adenocarcinoma	Colon	Gastrointestinal	PIK3CA	c.1633G>A (p.E545K)	no	Medical History not available
	Colorectal adenocarcinoma	Colon	Gastrointestinal	KRAS	c.35G>T (p.G12V)	yes
	Colorectal adenocarcinoma	Colon	Gastrointestinal	SMAD4	c.1082G>A (p.R361H)	no
	Colorectal adenocarcinoma	Colon	Gastrointestinal	SMAD4	c.1558G>T (p.E520*)	no
394	Colorectal adenocarcinoma	Colon	Gastrointestinal	KRAS	c.35G>T (p.G12V)	yes	Medical History not available
	Colorectal adenocarcinoma	Colon	Gastrointestinal	SMAD4	c.1619T>C (p.L540P)	no
	Colorectal adenocarcinoma	Colon	Gastrointestinal	FGFR2	c.757C>T (p.P253S)	yes
395	Colorectal adenocarcinoma	Colon	Gastrointestinal	TP53	c.742C>T (p.R248W)	no	Medical History not available
	Colorectal adenocarcinoma	Colon	Gastrointestinal	KRAS	c.181_183delCAAinsGAT (p.Q61D)	yes
	Colorectal adenocarcinoma	Colon	Gastrointestinal	MET	c.504G>T (p.E168D)	yes
396	Colorectal adenocarcinoma	Colon	Gastrointestinal	KRAS	c.182_183invAA (p.Q61L)	yes	Medical History not available
397	Colorectal adenocarcinoma	Colon	Gastrointestinal	TP53	c.517G>A (p.V173M)	no	Medical History not available
	Colorectal adenocarcinoma	Colon	Gastrointestinal	BRAF	c.1411G>A (p.V471I)	yes
	Colorectal adenocarcinoma	Colon	Gastrointestinal	KRAS	c.182A>G (p.Q61R)	yes
	Colorectal adenocarcinoma	Colon	Gastrointestinal	GNAS	c.2524C>T (p.R842C)	no
398	Colorectal adenocarcinoma	Colon	Gastrointestinal	KRAS	c.34_36delGGTinsTGG (p.G12W)	yes	Medical History not available
